# Supplementary material
Source: PubMed Central journal article supplement (PMC9006289)
Supplement: advancesADV2021006333-suppl1.pdf [file advancesADV2021006333-suppl1.pdf]

## Table of Contents

|                                                                                                                                                                                                     |    |
|-----------------------------------------------------------------------------------------------------------------------------------------------------------------------------------------------------|----|
| <i>Supplementary Table 1: Summary of risk of bias/quality assessment of included studies</i> .....                                                                                                  | 5  |
| <i>Supplementary Table 2: Summary of study characteristics and outcomes for patients with myeloma</i> .....                                                                                         | 11 |
| <i>Supplementary Table 3: Summary of study characteristics and outcomes for patients with chronic lymphocytic leukaemia</i> .....                                                                   | 16 |
| <i>Supplementary Table 4: Summary of study characteristics and outcomes for patients with lymphoma</i> .....                                                                                        | 20 |
| <i>Supplementary Table 5: Summary of study characteristics and outcomes for patients following haematopoietic stem cell transplant and cellular therapy</i> .....                                   | 22 |
| <i>Supplementary Table 6: Summary of study characteristics and outcomes for patients with acute leukaemia (AML, ALL) and myelodysplastic syndrome (MDS)</i> .....                                   | 24 |
| <i>Supplementary Table 7: Summary of study characteristics and outcomes for patients with myeloproliferative neoplasm and chronic myeloid leukaemia</i>                                             | 29 |
| <i>Supplementary Table 8: Summary of study characteristics and outcomes for subgroup analysis active treatment vs. no active treatment</i> .....                                                    | 36 |
| <i>Supplementary Table 9: Summary of study characteristics and outcomes for subgroup analysis CD20 therapy less than 12 months vs. CD20 therapy 12 or more months</i> .....                         | 40 |
| <i>Supplementary Table 10: Summary of study characteristics and outcomes for subgroup analysis targeted therapy vs. no targeted therapy</i> .....                                                   | 44 |
| <i>Supplementary Table 11: Summary of study characteristics and outcomes for subgroup analysis haematopoietic stem cell transplant within 12 months vs. 12 or more months</i> .....                 | 46 |
| <i>Supplementary Table 12: Summary of study characteristics and outcomes for subgroup analysis vaccine type (BNT162b2 vs others)</i> .....                                                          | 49 |
| <i>Supplementary Table 13: Summary of seropositivity rates for patients with haematological malignancy following 2 and 1 dose of COVID-19 vaccine by study quality (sensitivity analysis)</i> ..... | 50 |
| <i>Additional information: Search strategy</i> .....                                                                                                                                                | 51 |
| <i>Additional information: Abbreviations</i> .....                                                                                                                                                  | 53 |

| Study<br>(author,<br>year)  | Selection                                |                                     |                                                       |                                                                          | Comparability                                                   | Outcome               |                                                  |                                                     | Rating   |
|-----------------------------|------------------------------------------|-------------------------------------|-------------------------------------------------------|--------------------------------------------------------------------------|-----------------------------------------------------------------|-----------------------|--------------------------------------------------|-----------------------------------------------------|----------|
|                             | Representativeness of the exposed cohort | Selection of the non-exposed cohort | Ascertainment of exposure (refers to diagnosis of HM) | Demonstration that outcome of interest was not present at start of study | Comparability of cohorts on the basis of the design or analysis | Assessment of outcome | Was follow-up long enough for outcomes to occur? | Adequacy of follow up of cohorts (% follow-up rate) |          |
| Addeo et. al. 2021          | *                                        | NA                                  | *                                                     | *                                                                        | NA                                                              | *                     | *                                                | *                                                   | Good (A) |
| Agha et. al. 2021           | *                                        | NA                                  |                                                       |                                                                          | NA                                                              | *                     | *                                                | *                                                   | Poor (A) |
| Avivi et. al. 2021          | *                                        | *                                   | *                                                     | *                                                                        |                                                                 | *                     | *                                                | *                                                   | Poor     |
| Benda et. al. 2021          | *                                        | NA                                  | *                                                     |                                                                          | NA                                                              | *                     | *                                                | *                                                   | Fair (A) |
| Benjamini et. al. 2021      | *                                        | NA                                  | *                                                     |                                                                          | NA                                                              | *                     | *                                                | *                                                   | Fair (A) |
| Bird et. al. 2021           | *                                        | NA                                  | *                                                     |                                                                          | NA                                                              | *                     |                                                  | *                                                   | Fair (A) |
| Caocci et. al. 2021         |                                          | NA                                  |                                                       |                                                                          | NA                                                              | *                     | *                                                | *                                                   | Poor (A) |
| Cohen et. al. 2021          |                                          | NA                                  | *                                                     |                                                                          | NA                                                              | *                     | *                                                | *                                                   | Poor (A) |
| Del Poeta et. al. 2021      |                                          | NA                                  | *                                                     |                                                                          | NA                                                              | *                     | *                                                | *                                                   | Poor (A) |
| Dhakal et. al. 2021         |                                          | NA                                  | *                                                     |                                                                          | NA                                                              | *                     |                                                  | *                                                   | Poor (A) |
| Easdale et. al. 2021        |                                          | NA                                  | *                                                     |                                                                          | NA                                                              | *                     | *                                                | *                                                   | Poor (A) |
| Gavriatopoulou et. al. 2021 | *                                        | *                                   | *                                                     |                                                                          | *                                                               | *                     |                                                  | *                                                   | Good     |
| Ghandili et. al. 2021       | *                                        | NA                                  | *                                                     | *                                                                        | NA                                                              | *                     |                                                  | *                                                   | Good (A) |

|                                |   |    |   |   |    |   |   |   |          |
|--------------------------------|---|----|---|---|----|---|---|---|----------|
| Ghione et. al. 2021            | * | *  | * | * |    | * |   | * | Poor     |
| Greenberger et. al. 2021       | * | NA |   | * | NA | * | * | * | Fair (A) |
| Guglielmelli et. al. 2021      | * |    |   | * |    |   |   | * | Poor     |
| Gurion et. al. 2021            | * | NA | * |   | NA | * |   | * | Fair (A) |
| Harrington et. al. 2021 (BrJH) | * | NA | * |   | NA | * |   | * | Fair (A) |
| Harrington et. al. 2021 (Leuk) | * | NA | * |   | NA | * |   | * | Fair (A) |
| Herishanu et. al. 2021         | * |    | * | * | *  | * | * | * | Good     |
| Herzog Tzarfati et. al. 2021   | * |    | * |   | ** | * | * | * | Fair     |
| Iacono et. al. 2021            |   | *  | * | * |    | * |   |   | Poor     |
| Jurgens et. al. 2021           | * | *  | * |   |    | * | * | * | Poor     |
| Lim et. al. 2021               | * | *  | * | * |    | * |   |   | Poor     |
| Malard et. al. 2021            | * |    | * | * |    | * |   | * | Poor     |
| Manekis et. al. 2021           | * | *  | * | * | *  | * |   |   | Poor     |
| Monin et. al. 2021             | * | *  | * | * |    | * | * |   | Poor     |
| Ollila et. al. 2021            |   | NA | * |   | NA | * | * | * | Poor (A) |

|                                  |   |    |   |   |    |   |   |   |          |
|----------------------------------|---|----|---|---|----|---|---|---|----------|
| Parry et. al. 2021               |   | *  |   |   |    | * | * |   | Poor     |
| Perry et. al. 2021               | * |    | * | * | *  | * |   | * | Good     |
| Pimpinelli et. al. 2021 (PV/ET)  | * | NA | * | * | NA | * |   | * | Good (A) |
| Pimpinelli et. al. 2021 (MM/MPN) | * |    | * | * |    | * |   | * | Poor     |
| Ram et. al. 2021                 |   | NA | * | * | NA | * |   | * | Fair (A) |
| Ramasamy et. al. 2021            | * | NA |   |   | NA | * |   |   | Poor (A) |
| Re et. al. 2021                  |   | NA | * |   | NA |   |   | * | Poor (A) |
| Redjoul et.al. 2021              | * | NA | * |   | NA | * | * | * | Fair (A) |
| Roeker et. al. 2021              | * | NA | * |   | NA | * | * | * | Fair (A) |
| Stampfer et. al. 2021            | * | *  | * |   | *  | * |   | * | Good     |
| Strickland et. al. 2021          | * | *  | * | * | *  | * |   | * | Good     |
| Tadmor et. al. 2021              | * | NA | * |   | NA | * | * | * | Fair (A) |
| Terpos et. al. 2021 (Blood)      | * | *  | * | * | *  | * |   | * | Good     |
| Terpos et. al. 2021 (BCJ)        | * | *  | * |   | *  | * |   | * | Good     |
| Thakkar et. al. 2021             | * |    | * | * |    | * | * | * | Poor     |
| Van Oekelen et. al. 2021         | * | *  | * |   | *  | * | * | * | Good     |

Note: A study can be awarded a maximum of one star (★) for each numbered item within the selection and outcome domains. A maximum of two stars can be given for comparability domain. A good quality study would score 3 or 4 stars in selection domain, 1 or 2 stars in comparability domain, and 2 or 3 stars in outcome domain. A fair quality study would require 2 stars in selection domain, 1 or 2 stars in comparability domain, and 2 or 3 stars in outcome domain. On the other hand, a study will be regarded as poor quality if it reflects 0 or 1 star in selection domain, or 0 star in comparability domain, or 0 or 1 star in outcome domain. For studies without a control group, item 2 in selection domain and comparability domain are not applicable. Therefore, the rating system proposed by Sharmin et al was adapted accordingly; a good quality study would score 3 stars in selection domain, and 2 or 3 stars in outcome domain. A fair quality study would require 2 stars in selection domain, and 2 or 3 stars in outcome domain. On the other hand, a study will be regarded as poor quality if it reflects 0 or 1 star in selection domain, or 0 or 1 star in outcome domain. In this review, a good or fair quality study is considered of having low risk of bias while a poor quality study is regarded as high risk of bias.

HM: haematological malignancy; PV: Polycythaemia vera; ET: Essential thrombocytosis; MM: multiple myeloma; MPN: myeloproliferative neoplasm; BCJ: Blood Cancer Journal; NA: not applicable; A (adapted)

### **Supplementary Table 1: Summary of risk of bias/quality assessment of included studies**

| Study            | Type /Location                                                 | Study population/ Comparator      | Number of participants (analysed)    | Age Median       | Male/ Female         | Vaccine type                          | Analysis                                                           | Seropositivity                                                               | Rate of positive neutralising antibody/ cellular response | Adverse events                                                             |
|------------------|----------------------------------------------------------------|-----------------------------------|--------------------------------------|------------------|----------------------|---------------------------------------|--------------------------------------------------------------------|------------------------------------------------------------------------------|-----------------------------------------------------------|----------------------------------------------------------------------------|
| Avivi et. al.    | Single centre<br>Prospective cohort study<br><br>Israel        | Myeloma<br><br>Healthy volunteers | 171 patients<br><br>64 controls      | 70 years (38-94) | 96 Male<br>75 Female | BNT162b2                              | SARS-CoV-2 S IgG Roche $\geq 0.8$ UI/ml = positive                 | 14-21 days post second dose:<br>133/171 (78%)<br>vs.<br>63/64 (98%) controls | Not reported                                              | At least one adverse event:<br>90/161 (53%)<br>vs.<br>29/53 (55%) controls |
| Bird et. al.     | Single centre retrospective cohort study<br><br>United Kingdom | Myeloma                           | 93 patients                          | 67 years (47-87) | 55 Male<br>38 Female | BNT162b2<br>ChAdOx1<br><br>52%<br>48% | SARS-CoV-2 S IgG Ortho clinical $\geq 1$ signal/cut-off = positive | $\geq 21$ days post first dose:<br>52/93 (56%)                               | Not reported                                              | Not reported                                                               |
| Ghandili et. al. | Single centre prospective cohort study<br><br>Germany          | Myeloma                           | 82 patients                          | 68 years (40-85) | 49 Male<br>33 Female | BNT162b2<br>ChAdOx1<br><br>77%<br>23% | SARS-CoV-2 S IgG DiaSorin $\geq 34$ AU/ml = positive               | 21 days post first dose:<br>17/74 (23%)                                      | Not reported                                              | Not reported                                                               |
| Ramasamy et. al. | Multicentre web-based prospective cohort study<br>United       | Myeloma                           | 105 patients<br>-28 patients sampled | 63 years         | 67 Male<br>42 Female | BNT162b2<br>ChAdOx1<br><br>42%<br>58% | SARS-CoV-2 S IgG Abbott COI $\geq 50$ =                            | >21 days post first dose:<br>17/28 (61%)                                     | Not reported                                              | Not reported                                                               |

|                  |                                                             |                                                          |                                                |                  |                      |                                   |                                                                                                                         |                                                                                                                                                                                                                                                    |                                                                    |              |
|------------------|-------------------------------------------------------------|----------------------------------------------------------|------------------------------------------------|------------------|----------------------|-----------------------------------|-------------------------------------------------------------------------------------------------------------------------|----------------------------------------------------------------------------------------------------------------------------------------------------------------------------------------------------------------------------------------------------|--------------------------------------------------------------------|--------------|
|                  | Kingdom                                                     |                                                          |                                                |                  |                      |                                   | positive                                                                                                                |                                                                                                                                                                                                                                                    |                                                                    |              |
| Stampfer et. al. | Single centre prospective cohort study<br><br>United States | Myeloma<br><br>Healthy controls<br>Pre-COVID-19 controls | 103 patients<br><br>31 controls<br>34 controls | 68 years (35-88) | 61 Male<br>42 Female | BNT162b2 mRNA-1273<br><br>50%/50% | SARS-CoV-2 S IgG 'in house' 50-250 IU/ml = positive (partial response)<br><br>>250 IU/ml = clinically relevant response | 14-21 days post first dose: 20/96 (21%)<br><br>14-21 days post second dose: 64/96 (67%) vs. 31/31 (100%) controls<br><br>>250 IU/ml 14-21 days post first dose: 2/96 (2%)<br><br>14-21 days post second dose: 43/96 (45%) vs. 29/31 (94%) controls | Not reported                                                       | Not reported |
| Terpos et. al.   | Single centre prospective cohort study<br><br>Greece        | Myeloma<br><br>Matched Controls                          | 48 patients<br><br>102 controls                | 83 years (59-92) | 29 Male<br>19 Female | BNT162b2                          | SARS-CoV-2 neutralising Ab Genscript<br>≥ 30% = positive<br>≥ 50% = clinically relevant                                 | ≥ 30% 22 days post first dose: 12/48 (25%) vs. 57/102 (55%) controls                                                                                                                                                                               | ≥ 50% 22 days post first dose: 4/48 (8%) vs. 21/102 (20%) controls | Not reported |

|                     |                                                                               |                                                    |                                                                          |                  |                        |                                                          |                                                                                            |                                                                                                                                                            |                                                                                                                                                          |                                                                                                                                                                                                                                        |
|---------------------|-------------------------------------------------------------------------------|----------------------------------------------------|--------------------------------------------------------------------------|------------------|------------------------|----------------------------------------------------------|--------------------------------------------------------------------------------------------|------------------------------------------------------------------------------------------------------------------------------------------------------------|----------------------------------------------------------------------------------------------------------------------------------------------------------|----------------------------------------------------------------------------------------------------------------------------------------------------------------------------------------------------------------------------------------|
| Terpos et. al.      | Single centre prospective cohort study<br><br>Greece                          | Myeloma<br><br>Matched Controls                    | 276 patients<br>-77% myeloma<br>-14% sMM<br>-9% MGUS<br><br>226 controls | 74 years (62-80) | 151 Male<br>125 Female | BNT162b2<br>ChAdOx1<br><br>78%<br>22%                    | SARS-CoV-2 neutralising Ab<br>Genscript<br>≥ 30% = positive<br>≥ 50% = clinically relevant | Day 22 post first dose:<br>117/276 (42%)<br>vs.<br>145/226 (64%) controls<br><br>Day 50 post first dose:<br>196/276 (71%)<br>vs.<br>204/226 (90%) controls | Day 22 post first dose:<br>55/276 (20%)<br>vs.<br>73/226 (32%) controls<br><br>Day 50 post first dose:<br>158/276 (57%)<br>vs.<br>183/226 (81%) controls | First dose BNT162b2<br>71/215 (33%) local reaction<br><br>28/215 (13%) systemic reaction<br><br>ChAdOx1<br>20/61 (33%) local reaction<br><br>Second dose BNT162b2<br>68/215 (32%) local reaction<br><br>45/215 (21%) systemic reaction |
| Van Oekelen et. al. | Single centre prospective and retrospective cohort study<br><br>United States | Myeloma<br><br>Matched control health care workers | 320 patients<br>-260 sampled<br><br>67 controls                          | 68 years (38-93) | 185 Male<br>135 Female | BNT162b2<br>mRNA-1273<br>unknown<br><br>69%<br>27%<br>4% | SARS-CoV-2 S IgG<br>'in house'<br>≥ 5 AU/ml = positive                                     | 51 days post second dose:<br>219/260 (84%)<br>vs.<br>67/67 (100%) controls                                                                                 | Not reported                                                                                                                                             | Not reported                                                                                                                                                                                                                           |

| Subset of myeloma patients from other studies |                                                               |                                                           |                                                  |                      |                        |                                                 |                                                      |                                                                             |              |                       |
|-----------------------------------------------|---------------------------------------------------------------|-----------------------------------------------------------|--------------------------------------------------|----------------------|------------------------|-------------------------------------------------|------------------------------------------------------|-----------------------------------------------------------------------------|--------------|-----------------------|
| Agha et. al.                                  | Single centre retrospective cohort study<br><br>United States | Haematology Myeloma subset                                | 67 patients                                      | 71 years (IQR 65-77) | 35 Male<br>32 Female   | BNT162b2 mRNA-1273<br><br>51%/42%<br>7% unknown | SARS-CoV-2 S IgG Beckman Coulter<br>≥1.00 = positive | 21 days post second dose:<br>19/29 (66%)                                    | Not reported | Not reported          |
| Benda et. al.                                 | Single centre prospective cohort study                        | Haematology Myeloma subset<br><br>Solid tumour            | 123 patients<br>-34% myeloma<br><br>136 patients | Not reported in haem | Not reported in haem   | BNT162b2                                        | SARS-CoV-2 S IgG Roche<br>≥0.8 IU/ml = positive      | 28 days post second dose:<br>25/34 (74%)                                    | Not reported | Not reported for haem |
| Cohen et. al.                                 | Single centre retrospective study<br>Israel                   | Haematology Myeloma subset                                | 54 patients<br>-37% myeloma                      | 69 years (IQR 61-77) | 32 Male<br>22 Female   | BNT162b2                                        | SARS-CoV-2 S IgG Roche<br>≥0.8 IU/ml = positive      | 14-21 days post second dose:<br>16/20 (80%)                                 | Not reported | Not reported          |
| Greenberger et. al.                           | Multicentre prospective cohort study<br><br>United States     | Haematology Myeloma subset                                | 1445 patients<br>-15% myeloma                    | 68 years (16-110)    | 574 Male<br>871 Female | BNT162b2 mRNA-1273<br><br>55%<br>45%            | SARS-CoV-2 S IgG Roche<br>≥0.8 IU/ml = positive      | >14 days post second dose:<br>204/213 (96%)                                 | Not reported | Not reported          |
| Herzog Tzarfati et. al.                       | Single centre prospective cohort study<br><br>Israel          | Haematology Myeloma subset<br><br>Matched Healthy control | 315 patients<br>Myeloma -16%<br><br>108 controls | 70 years (IQR 61-77) | 223 Male<br>200 Female | BNT162b2                                        | SARS-CoV-2 S IgG DiaSorin<br>≥12 AU/ml = positive    | 30-60 days post second dose:<br>40/53 (76%)<br>vs.<br>107/108 (99%) control | Not reported | Not reported          |

|                    |                                                               |                                                                |                                                                                                                                 |                      |                          |                         |                                                                                                                                                                           |                                                                                                                                                                                                                                 |                                                                                                                                                                                                                                                |                                         |
|--------------------|---------------------------------------------------------------|----------------------------------------------------------------|---------------------------------------------------------------------------------------------------------------------------------|----------------------|--------------------------|-------------------------|---------------------------------------------------------------------------------------------------------------------------------------------------------------------------|---------------------------------------------------------------------------------------------------------------------------------------------------------------------------------------------------------------------------------|------------------------------------------------------------------------------------------------------------------------------------------------------------------------------------------------------------------------------------------------|-----------------------------------------|
| Ollila et. al.     | Single centre retrospective cohort study<br><br>United States | Haematology Myeloma subset                                     | 160 patients<br>-15% plasma cell                                                                                                | 72 years (65-79)     | 86 Male<br>74 Female     | BNT162b2 mRNA-1273 Ad26 | SARS-CoV-2 S IgG Abbott Signal/cutoff ratio $\geq 1.4$ = positive                                                                                                         | 56 days post first dose:<br>14/24 (58%) myeloma                                                                                                                                                                                 | Not reported                                                                                                                                                                                                                                   | Not reported                            |
| Monin et. al.      | Multicentre prospective cohort study<br><br>United Kingdom    | Haematology Myeloma subset<br><br>Health care workers controls | 56 patients<br>-68% B cell malignancy<br>-9% T cell malignancy<br>-18% myeloid/acute leukaemia<br>-5% others<br><br>54 controls | 73 years (IQR 65-80) | Not extractable for haem | BNT162b2                | SARS-CoV-2 Spike IgG $\geq 70$ EC50 = positive<br><br>SARS-CoV-2 specific T cells secreting IFN-gamma and/or IL2 $>7$ cytokine-secreting cells per $10^6$ PBMC = positive | 21 days post first dose:<br>3/9 (33%) vs. 32/34 (94%) Controls<br><br>35 days post first dose:<br>1/7 (14%) vs. 18/21 (86%) controls<br><br>35 days post first dose (with second dose):<br>1/1 (100%) vs. 12/12 controls (100%) | Cellular response 21 days post first dose:<br>2/3 (66%) vs. 14/17 (82%) controls<br><br>35 days post first dose:<br>1/4 (25%) vs. 9/13 (69%) controls<br><br>35 days post first dose (with second dose):<br>1/1 (100%) vs. 3/3 (100%) controls | Not extractable for haem                |
| Pimpinelli et. al. | Single centre prospective study<br><br>Italy                  | Haematology Myeloma subset<br><br>Older age ( $>80$ years)     | 42 patients<br><br>36 controls                                                                                                  | 73 years (47-78)     | 23 Male<br>19 Female     | BNT162b2                | SARS-CoV-2 S IgG DiaSorin $\geq 15$ AU/ml = positive                                                                                                                      | 21 days post first dose:<br>9/42 (21%) myeloma vs. 19/36 (53%)                                                                                                                                                                  | Not reported                                                                                                                                                                                                                                   | Reported with different patient numbers |

|            |                                                      |                            |                              |                  |                      |                                     |                                                   |                                                                                                                                                                                                                 |              |              |
|------------|------------------------------------------------------|----------------------------|------------------------------|------------------|----------------------|-------------------------------------|---------------------------------------------------|-----------------------------------------------------------------------------------------------------------------------------------------------------------------------------------------------------------------|--------------|--------------|
|            |                                                      | control group              |                              |                  |                      |                                     |                                                   | controls<br><br>14 days post second dose:<br>33/42 (79%)<br>myeloma<br>vs. 36/36<br>(100%)<br>controls<br><br>≥ 80 AU/ml<br>14 days post second dose<br>23/42 (55%)<br>myeloma<br>vs.<br>34/36 (97%)<br>control |              |              |
| Re et. al. | Multicentre retrospective cohort study<br><br>France | Haematology Myeloma subset | 102 patients<br>-22% myeloma | 76 years (33-93) | 67 Male<br>35 Female | BNT162b2 mRNA-1273<br><br>93%<br>7% | SARS-CoV-2 S IgG<br>Range of commercial platforms | 21-28 days post second dose<br>17/23 (74%)                                                                                                                                                                      | Not reported | Not reported |

**Supplementary Table 2: Summary of study characteristics and outcomes for patients with myeloma**

| Study             | Type /Location                                       | Study population/ Comparator                  | Number of participants (analysed) | Age Median       | Male/ Female           | Vaccine type | Analysis                                                                                                                | Seropositivity                                                                        | Rate of positive neutralising antibody/ cellular response            | Adverse events                                                                                                                |
|-------------------|------------------------------------------------------|-----------------------------------------------|-----------------------------------|------------------|------------------------|--------------|-------------------------------------------------------------------------------------------------------------------------|---------------------------------------------------------------------------------------|----------------------------------------------------------------------|-------------------------------------------------------------------------------------------------------------------------------|
| Benjamini et. al. | Multicentre prospective cohort study<br><br>Israel   | CLL patients                                  | 373 patients                      | 70 years (40-89) | 222 Male<br>151 Female | BNT162b2     | SARS-CoV-2 S IgG<br>DiaSorin $\geq 15$ AU/ml = positive<br>Abbott $>50$ U/ml = positive<br>'in house' $>1.1$ = positive | 14-21 days post second dose:<br>160/373 (43%)                                         | Neutralising antibody<br>14-21 days post second dose:<br>27/45 (60%) | At least 1 adverse event:<br>151/331 (47%)                                                                                    |
| Del Poeta et. al. | Single centre prospective cohort study<br><br>Italy  | CLL patients                                  | 46 patients                       | Not reported     | 29 Male<br>17 Female   | BNT162b2     | SARS-CoV-2 S IgG<br>Maglumi $\geq 1.1$ = positive                                                                       | 14-21 days post second dose:<br>25/46 (54%)                                           | Not reported                                                         | Not reported                                                                                                                  |
| Herishanu et. al. | Single centre prospective cohort study<br><br>Israel | CLL patients<br><br>Control -age, sex matched | 167 patients<br><br>52 controls   | 71 years (63-76) | 112 Male<br>55 Female  | BNT162b2     | SARS-CoV-2 S IgG<br>Roche $\geq 0.8$ IU/ml = positive                                                                   | 14-21 days post second dose:<br>66/167 (40%) patients<br>vs.<br>52/52 (100%) controls | Not reported                                                         | First dose<br>52/167 (31%)<br>local reaction<br><br>21/167 (13%)<br>Systemic reaction<br>Second dose<br>56/167 (34%)<br>local |

|                |                                                              |                                                  |                                 |                      |                        |                                    |                                                                                                                  |                                                                                                                                                                                                                                                                      |              |                                                     |
|----------------|--------------------------------------------------------------|--------------------------------------------------|---------------------------------|----------------------|------------------------|------------------------------------|------------------------------------------------------------------------------------------------------------------|----------------------------------------------------------------------------------------------------------------------------------------------------------------------------------------------------------------------------------------------------------------------|--------------|-----------------------------------------------------|
|                |                                                              |                                                  |                                 |                      |                        |                                    |                                                                                                                  |                                                                                                                                                                                                                                                                      |              | reaction<br>21/167<br>(23%)<br>Systemic<br>reaction |
| Parry et. al.  | Single centre prospective cohort study<br><br>United Kingdom | CLL patients<br><br>Healthy age matched controls | 299 patients<br><br>93 controls | 69 years (IQR 63-74) | 159 Male<br>140 Female | BNT162b2<br>ChAxOd1<br><br>52%/48% | SARS-CoV-2 S IgG Roche $\geq 0.8$ IU/ml = positive<br><br>Dried blood sampling Roche ratio $\geq 1.0$ = positive | 43 days post first dose:<br>Serum 29/86 (34%) vs. 89/95 (94%) Control<br><br>Dried blood 63/267 (24%) vs. 66/93 (71%) control<br><br>18 days post second dose:<br>Serum 9/12 (75%) vs. 59/59 (100%) Controls<br><br>Dried blood 39/55 (71%) vs. 36/37 (97%) controls | Not reported | Not reported                                        |
| Roeker et. al. | Single centre retrospective cohort study                     | CLL patients                                     | 44 patients                     | 71 years (37-89)     | 23 Male<br>21 Female   | BNT162b2 mRNA-1273                 | SARS-CoV-2 S IgG                                                                                                 | 21 days post second dose: 23/44 (52%)                                                                                                                                                                                                                                | Not reported | Not reported                                        |

|                                                              |                                                               |                                       |                                              |                      |                        |                                                       |                                                                                              |                                                 |              |              |
|--------------------------------------------------------------|---------------------------------------------------------------|---------------------------------------|----------------------------------------------|----------------------|------------------------|-------------------------------------------------------|----------------------------------------------------------------------------------------------|-------------------------------------------------|--------------|--------------|
|                                                              | United States                                                 |                                       |                                              |                      |                        | 57%<br>43%                                            | DiaSorin<br>≥ 15 AU/ml<br>= positive                                                         |                                                 |              |              |
| Tadmor et. al.                                               | Multicentre prospective observation study<br><br>Israel       | CLL patients                          | 84 patients                                  | 69 years (44-87)     | 53 Male<br>29 Female   | BNT162b2                                              | SARS-CoV-2 S IgG Abbott<br>≥ 50 U/ml = positive<br><br>SARS-CoV-2 RBD IgG<br>>1.1 = positive | 22 days post second dose:<br>49/84 (58%)        | Not reported | Not reported |
| <b>Subset of CLL patients from other haematology studies</b> |                                                               |                                       |                                              |                      |                        |                                                       |                                                                                              |                                                 |              |              |
| Agha et. al.                                                 | Single centre retrospective cohort study<br><br>United States | Haematology CLL subset                | 67 patients<br>-19% CLL                      | 71 years (IQR 65-77) | 35 Male<br>32 Female   | BNT162b2 mRNA-1273<br><br>51%<br>42%<br>7%<br>unknown | SARS-CoV-2 S IgG Beckman Coulter<br>≥1.00 = positive                                         | 21 days post second dose:<br>3/13 (23%)         | Not reported | Not reported |
| Greenberger et. al.                                          | Multicentre prospective cohort study<br><br>United States     | Haematology CLL subset                | 1445 patients<br>-45% CLL                    | 68 years (16-110)    | 574 Male<br>871 Female | BNT162b2 mRNA-1273<br><br>55%<br>45%                  | SARS-CoV-2 S IgG Roche<br>≥ 0.8 IU/ml = positive                                             | >14 days post second dose:<br>417/650 (64%)     | Not reported | Not reported |
| Herzog Tzarfati et. al.                                      | Single centre prospective cohort study<br><br>Israel          | Haematology CLL subset<br><br>Matched | 315 patients<br>-11% CLL<br><br>108 controls | 70 years (IQR 61-77) | 223 Male<br>200 Female | BNT162b2                                              | SARS-CoV-2 S IgG DiaSorin<br>≥ 12 AU/ml                                                      | 30-60 days post second dose:<br>16/34 (46%) vs. | Not reported | Not reported |

|                 |                                                             |                                                            |                                                                                                                      |                      |                          |                                      |                                                                                                                                                                             |                                                                                                                                                                                                                      |                                                                                                                                                                                                                                       |                          |
|-----------------|-------------------------------------------------------------|------------------------------------------------------------|----------------------------------------------------------------------------------------------------------------------|----------------------|--------------------------|--------------------------------------|-----------------------------------------------------------------------------------------------------------------------------------------------------------------------------|----------------------------------------------------------------------------------------------------------------------------------------------------------------------------------------------------------------------|---------------------------------------------------------------------------------------------------------------------------------------------------------------------------------------------------------------------------------------|--------------------------|
|                 |                                                             | Healthy control                                            |                                                                                                                      |                      |                          |                                      | = positive                                                                                                                                                                  | 107/108 (99%) control                                                                                                                                                                                                |                                                                                                                                                                                                                                       |                          |
| Jurgens et. al. | Single centre prospective cohort study<br><br>United States | Haematology CLL subset<br><br>Control health care workers  | 67 patients -31% CLL<br><br>35 controls                                                                              | 71 years (24-90)     | 36 Male<br>31 Female     | BNT162b2 mRNA-1273<br><br>46%<br>54% | SARS-CoV-2 S IgG 'in house' OD450 ≥ 3 = positive                                                                                                                            | 21 days post second dose: 12/21 (57%) vs. 35/35 (100%) controls                                                                                                                                                      | Not reported                                                                                                                                                                                                                          | Not reported             |
| Monin et. al.   | Multicentre prospective cohort study<br><br>United Kingdom  | Haematology CLL subset<br><br>Health care workers controls | 56 patients -68% B cell malignancy -9% T cell malignancy -18% myeloid/ acute leukaemia -5% others<br><br>54 controls | 73 years (IQR 65-80) | Not extractable for haem | BNT162b2                             | SARS-CoV-2 Spike IgG ≥ 70 EC50 = positive<br><br>SARS-CoV-2 specific T cells secreting IFN-gamma and/or IL2 >7 cytokine-secreting cells per 10 <sup>6</sup> PBMC = positive | 21 days post first dose: 1/6 (17%) vs. 32/34 (94%) Controls<br><br>35 days post first dose: 0/6 (0%) vs. 18/21 (86%) controls<br><br>35 days post first dose (with second dose): 1/2 (50%) vs. 12/12 (100%) controls | Cellular response 21 days post first dose: 2/5 (40%) vs. 14/17 (82%) controls<br><br>35 days post first dose: 1/4 (25%) vs. 9/13 (69%) controls<br><br>35 days post first dose (with second dose): 1/1 (100%) vs. 3/3 (100%) controls | Not extractable for haem |
| Ollila et. al.  | Single centre retrospective cohort study                    | Haematology CLL subset                                     | 160 patients -12% CLL                                                                                                | 72 years (65-79)     | 86 Male<br>74 Female     | BNT162b2 mRNA-1273 Ad26              | SARS-CoV-2 S IgG Abbott                                                                                                                                                     | 56 days post first dose: 7/19 (37%) CLL                                                                                                                                                                              | Not reported                                                                                                                                                                                                                          | Not reported             |

|  |               |  |  |  |  |  |                                              |  |  |  |
|--|---------------|--|--|--|--|--|----------------------------------------------|--|--|--|
|  | United States |  |  |  |  |  | Signal/cutoff ratio $\geq 1.4$<br>= positive |  |  |  |
|--|---------------|--|--|--|--|--|----------------------------------------------|--|--|--|

**Supplementary Table 3: Summary of study characteristics and outcomes for patients with chronic lymphocytic leukaemia**

| Study          | Type /Location                                                                 | Study population/ Comparator                                | Number of participants (analysed)                                                                              | Age Median           | Male/ Female         | Vaccine type                                    | Analysis                                                                                                      | Seropositivity                                                                                                                      | Rate of positive neutralising antibody/ cellular response | Adverse events |
|----------------|--------------------------------------------------------------------------------|-------------------------------------------------------------|----------------------------------------------------------------------------------------------------------------|----------------------|----------------------|-------------------------------------------------|---------------------------------------------------------------------------------------------------------------|-------------------------------------------------------------------------------------------------------------------------------------|-----------------------------------------------------------|----------------|
| Ghione et. al. | Single centre prospective cohort study<br><br>United States                    | B-cell lymphoma<br><br>Control age-care, healthcare workers | 86 patients<br><br>47 controls<br><br>154 controls                                                             | 70 years (35-91)     | 45 Male<br>41 Female | BNT162b2 mRNA-1273 Ad26<br><br>47%<br>52%<br>1% | SARS-CoV-2 S IgG<br>BioRad<br>≥1.0 = positive                                                                 | 14-56 days post completion of vaccination:<br>36/86 (42%) patients<br>vs.<br>43/47 (92%) age-care<br><br>154/154 (100%) healthcare  | Not reported                                              | Not reported   |
| Gurion et. al. | Multicentre prospective cohort study<br><br>Israel                             | Lymphoma                                                    | 162 patients<br>-88% NHL<br>-12% HL                                                                            | 65 years (52-73)     | 89 Male<br>73 Female | BNT162b2                                        | SARS-CoV-2 S IgG<br>Abbott<br>≥ 50 IU/ml = positive                                                           | 28 days post second dose:<br>83/162 (51%)                                                                                           | Not reported                                              | Not reported   |
| Lim et. al.    | Multicentre prospective cohort study<br>Interim analysis<br><br>United Kingdom | Lymphoma                                                    | 129 patients recruited<br>119 analysed<br>-66% indolent B-NHL<br>-29% aggressive B-NHL<br>-10% HL<br>-3% other | 69 years (IQR 57-74) | 81 Male<br>48 Female | BNT162b2 ChAdOx1                                | SARS-CoV-2 S IgG<br>Meso Scale<br>Discovery<br>>0.55<br>BAU/ml = positive<br><br>RBD IgG<br>>0.73<br>BAU/ml = | 14 days post first dose:<br>32/59 (54%) patients<br>vs.<br>65/65 (100%) controls<br><br>14-28 days post second dose:<br>61/86 (71%) | Not reported                                              | Not reported   |

|                                                                   |                                                               |                                                     |                                                                       |                      |                        |                                                 |                                                         |                                                                                                                                      |              |                                                                                                     |
|-------------------------------------------------------------------|---------------------------------------------------------------|-----------------------------------------------------|-----------------------------------------------------------------------|----------------------|------------------------|-------------------------------------------------|---------------------------------------------------------|--------------------------------------------------------------------------------------------------------------------------------------|--------------|-----------------------------------------------------------------------------------------------------|
|                                                                   |                                                               | Healthy control                                     | 150 control                                                           |                      |                        |                                                 | positive                                                | patients vs. 85/85 (100%) controls                                                                                                   |              |                                                                                                     |
| Perry et. al.                                                     | Single centre prospective cohort study<br><br>Israel          | Lymphoma -B cell NHL<br><br><br><br>Healthy control | 149 patients -53% indolent NHL -47% aggressive NHL<br><br>65 controls | 64 years (20-92)     | 88 Male<br>61 Female   | BNT162b2                                        | SARS-CoV-2 S IgG Roche $\geq 0.8$ IU/ml = positive      | 14-21 days post second dose: 73/149 (49%) vs. 64/65 (99%) controls<br><br>38/80 (48%) indolent NHL<br><br>34/69 (49%) aggressive NHL | Not reported | At least 1 adverse event: 60/118 (51%)<br><br>44/118 (37%) local AE<br><br>23/118 (20%) Systemic AE |
| <b>Subset of lymphoma patients from other haematology studies</b> |                                                               |                                                     |                                                                       |                      |                        |                                                 |                                                         |                                                                                                                                      |              |                                                                                                     |
| Agha et. al.                                                      | Single centre retrospective cohort study<br><br>United States | Haematology Lymphoma subset                         | 67 patients -31% lymphoma                                             | 71 years (IQR 65-77) | 35 Male<br>32 Female   | BNT162b2 mRNA-1273<br><br>51%/42%<br>7% unknown | SARS-CoV-2 S IgG Beckman Coulter $\geq 1.00$ = positive | 21 days post second dose: 11/21 (52%)                                                                                                | Not reported | Not reported                                                                                        |
| Cohen et. al.                                                     | Single centre retrospective cohort study<br>Israel            | Haematology Lymphoma subset                         | 54 patients -61% lymphoma                                             | 69 years (IQR 61-77) | 32 Male<br>22 Female   | BNT162b2                                        | SARS-CoV-2 S IgG Roche $\geq 0.8$ IU/ml = positive      | 14-21 days post second dose: 17/33 (52%)                                                                                             | Not reported | Not reported                                                                                        |
| Greenberger et. al.                                               | Multicentre prospective                                       | Haematology Lymphoma                                | 1445 patients                                                         | 68 years (16-110)    | 574 Male<br>871 Female | BNT162b2 mRNA-1273                              | SARS-CoV-2                                              | >14 days post second dose:                                                                                                           | Not reported | Not reported                                                                                        |

|                               |                                                                     |                                                      |                                                                                                   |                             |                                |                                      |                                                                  |                                                                                                                                                                       |                                                                                         |                                |
|-------------------------------|---------------------------------------------------------------------|------------------------------------------------------|---------------------------------------------------------------------------------------------------|-----------------------------|--------------------------------|--------------------------------------|------------------------------------------------------------------|-----------------------------------------------------------------------------------------------------------------------------------------------------------------------|-----------------------------------------------------------------------------------------|--------------------------------|
|                               | cohort study<br>United States                                       | subset                                               | -25% NHL<br>-5% HL                                                                                |                             |                                | 55%<br>45%                           | S IgG<br>Roche<br>≥ 0.8 IU/ml<br>= positive                      | 266/363<br>(73%)<br>NHL<br>64/65<br>(98%)<br>HL                                                                                                                       |                                                                                         |                                |
| Herzog<br>Tzarfati et.<br>al. | Single centre<br>prospective<br>cohort study<br><br>Israel          | Haematology<br><br><br>Matched<br>Healthy<br>control | 315 patient<br>-16%<br>aggressive<br>NHL<br>-13%<br>indolent<br>NHL<br>-5% HL<br><br>108 controls | 70 years<br>(IQR 61-<br>77) | 223 Male<br>200 Female         | BNT162b2                             | SARS-<br>CoV-2 S<br>IgG<br>DiaSorin<br>≥ 12 AU/ml<br>= positive  | 30-60 days<br>post second<br>dose:<br>36/51 (71%)<br>aggressive<br>NHL<br><br>24/40 (60%)<br>Indolent NHL<br><br>15/17 (94%)<br>HL<br>vs.<br>107/108<br>(99%) control | Not reported                                                                            | Not reported                   |
| Jurgens et.<br>al.            | Single centre<br>prospective<br>cohort study<br><br>United States   | Haematology<br><br>Control health<br>care workers    | 67 patients<br>-63% NHL<br>-6% HL<br><br>35 controls                                              | 71 years<br>(24-90)         | 36 Male<br>31 Female           | BNT162b2<br>mRNA-1273<br><br>46%/54% | SARS-<br>CoV-2 S<br>IgG<br>'in house'<br>OD450 ≥ 3<br>= positive | 21 days post<br>second dose:<br>25/42 (60%)<br>NHL<br><br>4/4 (100%)<br>HL<br>vs.<br>35/35 (100%)<br>controls                                                         | Not reported                                                                            | Not reported                   |
| Monin et.<br>al.              | Multicentre<br>prospective<br>cohort study<br><br>United<br>Kingdom | Haematology<br>Lymphoma<br>subset                    | 56 patients<br>-68% B cell<br>malignancy<br>-9% T cell<br>malignancy<br>-18%<br>myeloid/          | 73 years<br>(IQR 65-<br>80) | Not<br>extractable<br>for haem | BNT162b2                             | SARS-<br>CoV-2<br>Spike IgG<br>≥ 70 EC50<br>= positive           | 21 days post<br>first dose:<br>2/15 (13%)<br>vs.<br>32/34 (94%)<br>Controls                                                                                           | Cellular<br>response<br>21 days post<br>first dose:<br>3/3 (100%)<br>vs.<br>14/17 (82%) | Not<br>extractable<br>for haem |

|                |                                                               |                              |                                                                                  |                  |                      |                         |                                                                                                                            |                                                                                                                                                                  |                                                                                                                                                                |              |
|----------------|---------------------------------------------------------------|------------------------------|----------------------------------------------------------------------------------|------------------|----------------------|-------------------------|----------------------------------------------------------------------------------------------------------------------------|------------------------------------------------------------------------------------------------------------------------------------------------------------------|----------------------------------------------------------------------------------------------------------------------------------------------------------------|--------------|
|                |                                                               | Health care workers controls | acute leukaemia<br>-5% others<br><br>54 controls                                 |                  |                      |                         | SARS-CoV-2 specific T cells secreting IFN-gamma and/or IL2 >7 cytokine-secreting cells per 10 <sup>6</sup> PBMC = positive | 35 days post first dose: 1/10 (10%) vs. 18/21 (86%) controls<br><br>35 days post first dose (with second dose): 0/1 (0%) vs. 12/12 (100%) controls               | controls<br><br>35 days post first dose: 1/3 (33%) vs. 9/13 (69%) controls<br><br>35 days post first dose (with second dose): 0/1 (0%) vs. 3/3 (100%) controls |              |
| Ollila et. al. | Single centre retrospective cohort study<br><br>United States | Haematology Lymphoma subset  | 160 patients -36% aggressive lymphoma -21% indolent lymphoma - 9% other lymphoma | 72 years (65-79) | 86 Male<br>74 Female | BNT162b2 mRNA-1273 Ad26 | SARS-CoV-2 S IgG Abbott Signal/cutoff ratio ≥1.4 = positive                                                                | 56 days post first dose: 27/107 (25%) Total lymphoma<br><br>9/58 (16%) Aggressive lymphoma<br><br>12/34 (35%) indolent lymphoma<br><br>6/15 (40%) Other lymphoma | Not reported                                                                                                                                                   | Not reported |

**Supplementary Table 4: Summary of study characteristics and outcomes for patients with lymphoma**

| Study           | Type /Location                                                 | Study population/ Comparator          | Number of participants (analysed)         | Age Median       | Male/ Female         | Vaccine type                          | Analysis                                                                               | Seropositivity                                                                                          | Rate of positive neutralising antibody/ cellular response                                  | Adverse events                                                                                            |
|-----------------|----------------------------------------------------------------|---------------------------------------|-------------------------------------------|------------------|----------------------|---------------------------------------|----------------------------------------------------------------------------------------|---------------------------------------------------------------------------------------------------------|--------------------------------------------------------------------------------------------|-----------------------------------------------------------------------------------------------------------|
| Easdale et. al. | Single centre retrospective cohort study<br><br>United Kingdom | Allogeneic HCT<br>>3 months           | 55 patients                               | 50 years (18-73) | 34 Male<br>21 Female | BNT162b2<br>ChAdOx1<br><br>38%<br>62% | SARS-CoV-2 S IgG<br>Ortho clinical<br>≥1 signal/cut-off = positive                     | 42 days post first dose:<br>21/55 (38%)                                                                 | Not reported                                                                               | Not reported                                                                                              |
| Redjoul et. al. | Single centre retrospective cohort study<br><br>France         | Allogeneic HCT                        | 88 patients                               | Not reported     | 47 Male<br>41 Female | BNT162b2                              | SARS-CoV-2 S IgG<br>Abbott<br>>21 AU/ml = positive<br><br>>4160 AU/ml = neutralisation | 28 days post second dose:<br>69/88 (78%)<br><br>>4160 AU/ml<br>28 days post second dose:<br>52/88 (59%) | Not reported                                                                               | Not reported                                                                                              |
| Ram et. al.     | Single centre prospective cohort study<br><br>Israel           | Allogeneic HCT and CAR-T<br>>3 months | 80 patients<br>-83% alloHCT<br>-17% CAR-T | 65 years (23-83) | 44 Male<br>37 Female | BNT162b2                              | SARS-CoV-2 S IgG<br>Roche<br>≥ 0.8 U/ml = positive<br><br>SARS-CoV-2 specific cells    | 7 to 14 days post second dose:<br>47/63 (75%)<br>alloHCT<br>5/14 (36%)<br>CAR-T                         | Cellular<br>7 to 14 days post second dose:<br>7/37 (19%)<br>alloHCT<br>6/12 (50%)<br>CAR-T | At least 1 adverse event:<br>First dose<br>11/80 (14%)<br>3/80 (4%)<br>GvHD<br>Second dose<br>18/74 (24%) |

|                                                              |                                                               |                                                                              |                                                         |                                                                                                     |                        |                                                       |                                                                              |                                                                                                                    |              |                   |
|--------------------------------------------------------------|---------------------------------------------------------------|------------------------------------------------------------------------------|---------------------------------------------------------|-----------------------------------------------------------------------------------------------------|------------------------|-------------------------------------------------------|------------------------------------------------------------------------------|--------------------------------------------------------------------------------------------------------------------|--------------|-------------------|
|                                                              |                                                               |                                                                              |                                                         |                                                                                                     |                        |                                                       | ELISPOT,<br>(IFN, IL2)<br>4 spots/well<br>= positive                         |                                                                                                                    |              | 3/74 (4%)<br>GvHD |
| Dhakal et. al.                                               | Single centre retrospective cohort study<br><br>United States | Autologous<br>Allogeneic<br>HCT<br>CAR-T                                     | 130 patients<br>-45 autoHCT<br>-71 alloHCT<br>-14 CAR-T | autoHCT<br>65 years<br>(45-75)<br>alloHCT<br>64 years<br>(25-77)<br><br>Age not specified for CAR-T | Not reported           | BNT162b2<br>mRNA-1273<br>Ad26<br><br>59%<br>36%<br>5% | SARS-CoV-2 S<br>IgG<br>EUROIMM<br>UN<br>≥1.1<br>signal/cut-off =<br>positive | 14 days post completion of vaccination:<br>27/45 (60%)<br>autoHCT<br>49/71 (38%)<br>alloHCT<br>3/14 (21%)<br>CAR-T | Not reported | Not reported      |
| <b>Subset of HCT patients from other haematology studies</b> |                                                               |                                                                              |                                                         |                                                                                                     |                        |                                                       |                                                                              |                                                                                                                    |              |                   |
| Herzog Tzarfati et. al.                                      | Single centre prospective cohort study<br><br>Israel          | Haematology<br>Autologous<br>HCT subset<br><br>Matched<br>Healthy<br>control | 315 patients<br><br>108 controls                        | 70 years<br>(IQR 61-77)                                                                             | 223 Male<br>200 Female | BNT162b2                                              | SARS-CoV-2 S<br>IgG<br>DiaSorin<br>≥ 12 AU/ml<br>= positive                  | 30-60 days post second dose:<br>17/21 (81%)<br>autoHCT<br>vs.<br>107/108<br>(99%) control                          | Not reported | Not reported      |
| Greenberg et. al.                                            | Multicentre prospective cohort study<br><br>United States     | Haematology<br>HCT and<br>CAR-T subset                                       | 1445 patients                                           | 68 years<br>(16-110)                                                                                | 574 Male<br>871 Female | BNT162b2<br>mRNA-1273<br><br>45%<br>55%               | SARS-CoV-2 S<br>IgG<br>Roche<br>≥ 0.8 IU/ml<br>= positive                    | >14 days post second dose:<br>65/73 (89%)<br>HCT<br><br>5/12 (42%)<br>CAR-T                                        | Not reported | Not reported      |

**Supplementary Table 5: Summary of study characteristics and outcomes for patients following haematopoietic stem cell transplant and cellular therapy**

| Study                                                                                                 | Type /Location                                            | Study population/ Comparator                                          | Number of participants (analysed)                           | Age Median           | Male/ Female             | Vaccine type                         | Analysis                                             | Seropositivity                                                                                               | Rate of positive neutralising antibody/ cellular response | Adverse events           |
|-------------------------------------------------------------------------------------------------------|-----------------------------------------------------------|-----------------------------------------------------------------------|-------------------------------------------------------------|----------------------|--------------------------|--------------------------------------|------------------------------------------------------|--------------------------------------------------------------------------------------------------------------|-----------------------------------------------------------|--------------------------|
| <b>Subset of acute leukaemia and myelodysplastic syndrome patients from other haematology studies</b> |                                                           |                                                                       |                                                             |                      |                          |                                      |                                                      |                                                                                                              |                                                           |                          |
| Benda et. al.                                                                                         | Single centre prospective cohort study                    | Haematology AML subset<br><br>Solid tumour                            | 123 patients -28% AML/MDS/MPN<br><br>136 patients           | Not reported in haem | Not reported in haem     | BNT162b2                             | SARS-CoV-2 S IgG Roche $\geq 0.8$ IU/ml = positive   | 28 days post second dose: 33/34 (97%)                                                                        | Not reported                                              | Not reported for haem    |
| Greenberg et. al.                                                                                     | Multicentre prospective cohort study<br><br>United States | Haematology Acute leukaemia subset                                    | 1445 patients -4% acute leukaemia                           | 68 years (16-110)    | 574 Male<br>871 Female   | BNT162b2 mRNA-1273<br><br>55%<br>45% | SARS-CoV-2 S IgG Roche $\geq 0.8$ IU/ml = positive   | >14 days post second dose: 46/51 (90%)                                                                       | Not reported                                              | Not reported             |
| Herzog Tzarfati et. al.                                                                               | Single centre prospective cohort study<br><br>Israel      | Haematology Acute leukaemia MDS subset<br><br>Matched Healthy control | 315 patients -5% Acute leukemia -5% MDS<br><br>108 controls | 70 years (IQR 61-77) | 223 Male<br>200 Female   | BNT162b2                             | SARS-CoV-2 S IgG DiaSorin $\geq 12$ AU/ml = positive | 30-60 days post second dose: 12/15 (80%) acute leukaemia<br><br>15/16 (94%) MDS<br>vs. 107/108 (99%) control | Not reported                                              | Not reported             |
| Monin et. al.                                                                                         | Multicentre prospective cohort study                      | Haematology Acute leukaemia subset                                    | 56 patients -18% myeloid, leukaemia                         | 73 years (IQR 65-80) | Not extractable for haem | BNT162b2                             | SARS-CoV-2 Spike IgG $\geq 70$ EC50                  | 21 days post first dose: 0/3 (0%) vs.                                                                        | Cellular response 21 days post first dose:                | Not extractable for haem |

|                |                                                               |                              |                           |                  |                      |                                  |                                                                                                                                              |                                                                                        |                                                                                                     |              |
|----------------|---------------------------------------------------------------|------------------------------|---------------------------|------------------|----------------------|----------------------------------|----------------------------------------------------------------------------------------------------------------------------------------------|----------------------------------------------------------------------------------------|-----------------------------------------------------------------------------------------------------|--------------|
|                | United Kingdom                                                | Health care workers controls | -5% others<br>54 controls |                  |                      |                                  | = positive<br><br>SARS-CoV-2 specific T cells secreting IFN-gamma and/or IL2 >7 cytokine-secreting cells per 10 <sup>6</sup> PBMC = positive | 32/34 (94%) Controls<br><br>35 days post first dose: 0/3 (0%) vs. 18/21 (86%) controls | 0/1 (0%) vs. 14/17 (82%) controls<br><br>35 days post first dose: 1/2 (50%) vs. 9/13 (69%) controls |              |
| Ollila et. al. | Single centre retrospective cohort study<br><br>United States | Haematology Myeloid subset   | 160 patients - 6% myeloid | 72 years (65-79) | 86 Male<br>74 Female | BNT162b2 mRNA-1273 Ad26          | SARS-CoV-2 S IgG Abbott Signal/cutoff ratio ≥1.4 = positive                                                                                  | 56 days post first dose: 5/10 (50%) myeloid malignancies                               | Not reported                                                                                        | Not reported |
| Re et. al.     | Multicentre retrospective cohort study<br><br>France          | Haematology AML/MDS subset   | 102 patients -13% MDS/AML | 76 years (33-93) | 67 Male<br>35 Female | BNT162b2 mRNA-1273<br><br>93%/7% | SARS-CoV-2 S IgG Range of commercial kits utilising their threshold                                                                          | 21-28 days post second dose<br>11/13 (85%)                                             | Not reported                                                                                        | Not reported |

**Supplementary Table 6: Summary of study characteristics and outcomes for patients with acute leukaemia (AML, ALL) and myelodysplastic syndrome (MDS)**

| Study              | Type /Location                                               | Study population/Comparator                          | Number of participants (analysed)                               | Age Median           | Male/Female          | Vaccine type                            | Analysis                                                         | Seropositivity                                                                | Rate of positive neutralising antibody/cellular response                                        | Adverse events                                                              |
|--------------------|--------------------------------------------------------------|------------------------------------------------------|-----------------------------------------------------------------|----------------------|----------------------|-----------------------------------------|------------------------------------------------------------------|-------------------------------------------------------------------------------|-------------------------------------------------------------------------------------------------|-----------------------------------------------------------------------------|
| Caocci et. al.     | Single centre prospective cohort study<br><br>Italy          | MPN                                                  | 20 patients<br>-65% MF<br>-30% ET<br>-5% PV                     | 66 years (48-82)     | Not reported         | BNT162b2                                | SARS-CoV-2 S IgG<br>DiaSorin<br>≥ 15 AU/ml = positive            | 42 days post second dose:<br>13/20 (65%)                                      | Not reported                                                                                    | Not reported                                                                |
| Chowdhury et. al.  | Single centre retrospective cohort<br><br>United Kingdom     | CML and MPN<br><br>Healthcare workers > 60 years old | 59 patients<br><br>232 controls                                 | 62 years (IQR 52-73) | 27 Male<br>32 Female | BNT162b2<br>ChAdOx1<br><br>37%<br>63%   | SARS-CoV-2 S IgG<br>Abbott<br>≥ 50 AU/mL = positive              | ≥ 2 weeks post first dose:<br>34/59 (57%)<br><br>224/232 (97%)                | Not reported                                                                                    | Not reported                                                                |
| Guglielmi et. al.  | Single centre prospective cohort study<br><br>Italy          | MPN<br><br>Healthy controls                          | 30 patients<br>-43% MF<br>-33% PV<br>-23% ET<br><br>14 controls | Not reported overall | 10 Male<br>20 Female | BNT162b2<br>mRNA-1273<br><br>83%<br>17% | SARS-CoV-2 S/RBD IgG<br>Not specified                            | 21 to 28 days post first dose:<br>18/30 (60%)<br>vs.<br>14/14 (100%) controls | 21 to 28 days post first dose:<br>13/30 (43%)<br>vs.<br>14/14 (100%) controls                   | Not reported                                                                |
| Harrington et. al. | Single centre prospective cohort study<br><br>United Kingdom | MPN                                                  | 16 patients<br>-CML                                             | 45 years (23-74)     | 12 Male<br>4 Female  | BNT162b2                                | SARS-CoV-2 S IgG 'in house'<br>1:25 = positive<br><br>SARS-CoV-2 | 21 days post first dose:<br>14/16 (88%)                                       | Neutralising antibody<br>21 days post first dose:<br>6/16 (38%)<br><br>Cellular:<br>14/15 (80%) | Local adverse events: 8/16 (50%)<br><br>Systemic adverse events: 9/16 (56%) |

|                       |                                                                       |     |                                              |                     |                      |          |                                                                                                                                                                                                                              |                                            |                                                                                                                 |                                                                                        |
|-----------------------|-----------------------------------------------------------------------|-----|----------------------------------------------|---------------------|----------------------|----------|------------------------------------------------------------------------------------------------------------------------------------------------------------------------------------------------------------------------------|--------------------------------------------|-----------------------------------------------------------------------------------------------------------------|----------------------------------------------------------------------------------------|
|                       |                                                                       |     |                                              |                     |                      |          | neutralising<br>'in house'<br>ID50 =<br>positive<br><br>SARS-CoV-<br>2 T cells<br>ICS (IFN,<br>IL2)<br>3 fold<br>increase =<br>positive                                                                                      |                                            |                                                                                                                 |                                                                                        |
| Harrington<br>et. al. | Single centre<br>prospective<br>cohort study<br><br>United<br>Kingdom | MPN | 21 patients                                  | 58 years<br>(36-72) | 7 Male<br>21 Female  | BNT162b2 | SARS-CoV-<br>2<br>S IgG 'in<br>house'<br>1:25 =<br>positive<br><br>SARS-CoV-<br>2<br>neutralising<br>'in house'<br>ID50 =<br>positive<br><br>SARS-CoV-<br>2 T cells<br>ICS (IFN,<br>IL2)<br>3 fold<br>increase =<br>positive | 21 days post<br>first dose:<br>16/21 (76%) | Neutralising<br>antibody<br>21 days post<br>first dose:<br>18/21 (86%)<br><br>Cellular<br>(CD4):<br>15/20 (75%) | At least 1<br>adverse<br>event:<br>12/21 (57%)<br>local<br><br>10/21 (48%)<br>systemic |
| Pimpinelli<br>et. al. | Single centre<br>prospective<br>cohort study                          | MPN | 42 patients<br>-40% ET<br>-36% PV<br>-24% MF | 72 years<br>(52-82) | 20 Male<br>22 Female | BNT162b2 | SARS-CoV-<br>2 S IgG<br>DiaSorin<br>≥ 15 AU/ml                                                                                                                                                                               | 21 days post<br>first dose:<br>23/42 (55%) | Not reported                                                                                                    | Not reported                                                                           |

|                                                                                                                    |                                                            |                                            |                                                                       |                      |                          |                                      |                                                                             |                                                                                                 |                                                                                        |                          |
|--------------------------------------------------------------------------------------------------------------------|------------------------------------------------------------|--------------------------------------------|-----------------------------------------------------------------------|----------------------|--------------------------|--------------------------------------|-----------------------------------------------------------------------------|-------------------------------------------------------------------------------------------------|----------------------------------------------------------------------------------------|--------------------------|
|                                                                                                                    | Italy                                                      |                                            |                                                                       |                      |                          |                                      | = positive                                                                  | 14 days post second dose: 36/42 (86%)                                                           |                                                                                        |                          |
| <b>Subset of myeloproliferative neoplasm and chronic myeloid leukaemia patients from other haematology studies</b> |                                                            |                                            |                                                                       |                      |                          |                                      |                                                                             |                                                                                                 |                                                                                        |                          |
| Benda et. al.                                                                                                      | Single centre prospective cohort study                     | Haematology MPN subset<br><br>Solid tumour | 123 patients -28% AML/MDS/MPN<br><br>136 patients                     | Not reported in haem | Not reported in haem     | BNT162b2                             | SARS-CoV-2 S IgG Roche $\geq 0.8$ IU/ml = positive                          | 28 days post second dose: 33/34 (97%)                                                           | Not reported                                                                           | Not reported for haem    |
| Greenberger et. al.                                                                                                | Multicentre prospective cohort study<br><br>United States  | Haematology CML subset                     | 1445 patients -2% CML                                                 | 68 years (16-110)    | 574 Male<br>871 Female   | BNT162b2 mRNA-1273<br><br>55%<br>45% | SARS-CoV-2 S IgG Roche $\geq 0.8$ IU/ml = positive                          | >14 days post second dose: 33/34 (97%)                                                          | Not reported                                                                           | Not reported             |
| Herzog Tzarfati et. al.                                                                                            | Single centre prospective cohort study<br><br>Israel       | Haematology<br><br>Matched Healthy control | 315 patients -22% MPN -7% CML<br><br>108 controls                     | 70 years (IQR 61-77) | 223 Male<br>200 Female   | BNT162b2                             | SARS-CoV-2 S IgG DiaSorin $\geq 12$ AU/ml = positive                        | 30-60 days post second dose: 57/68 (84%) MPN<br>20/22 (91%) CML<br>vs.<br>107/108 (99%) control | Not reported                                                                           | Not reported             |
| Monin et. al.                                                                                                      | Multicentre prospective cohort study<br><br>United Kingdom | Haematology MPN subset                     | 56 patients -68% B cell -9% T cell -18% myeloid, leukaemia -5% others | 73 years (IQR 65-80) | Not extractable for haem | BNT162b2                             | SARS-CoV-2 Spike IgG $\geq 70$ EC50 = positive<br><br>SARS-CoV-2 specific T | 21 days post first dose: 1/5 (20%)<br>vs.<br>32/34 (94%)<br>Controls<br>35 days post            | Cellular response 21 days post first dose: 1/3 (33%)<br>vs.<br>14/17 (82%)<br>controls | Not extractable for haem |

|                    |                                              |                                                                    |                                                                             |                  |                      |          |                                                                                                      |                                                                                                                                                                                                             |                                                                                                                                              |                                         |
|--------------------|----------------------------------------------|--------------------------------------------------------------------|-----------------------------------------------------------------------------|------------------|----------------------|----------|------------------------------------------------------------------------------------------------------|-------------------------------------------------------------------------------------------------------------------------------------------------------------------------------------------------------------|----------------------------------------------------------------------------------------------------------------------------------------------|-----------------------------------------|
|                    |                                              | Health care workers controls                                       | 54 controls                                                                 |                  |                      |          | cells secreting IFN-gamma and/or IL2 >7 cytokine-secreting cells per 10 <sup>6</sup> PBMC = positive | first dose: 1/4 (25%) vs. 18/21 (86%) controls<br>35 days post first dose (with second dose): 1/1 (100%) vs. 12/12 (100%) controls                                                                          | 35 days post first dose: 1/2 (50%) vs. 9/13 (69%) controls<br>35 days post first dose (with second dose): 1/1 (100%) vs. 3/3 (100%) controls |                                         |
| Pimpinelli et. al. | Single centre prospective study<br><br>Italy | Haematology MPN subset<br><br>Older age (> 80 years) control group | 50 patients<br>-40% CML<br>-22% ET<br>-22% PV<br>-16% MF<br><br>36 controls | 70 years (28-80) | 26 Male<br>24 Female | BNT162b2 | SARS-CoV-2 S IgG DiaSorin ≥ 15 AU/ml = positive                                                      | 21 days post first dose: 26/50 (52%) MPN vs. 19/36 (53%) controls<br><br>14 days post second dose: 44/50 (88%) MPN vs. 36/36 (100%) controls<br><br>≥ 80 AU/ml 14 days post second dose 42/50 (84%) MPN vs. | Not reported                                                                                                                                 | Reported with different patient numbers |

|            |                                                            |                           |                                                                                                |                     |                      |                                     |                                                                                        |                                                 |              |              |
|------------|------------------------------------------------------------|---------------------------|------------------------------------------------------------------------------------------------|---------------------|----------------------|-------------------------------------|----------------------------------------------------------------------------------------|-------------------------------------------------|--------------|--------------|
|            |                                                            |                           |                                                                                                |                     |                      |                                     |                                                                                        | 34/36 (97%)<br>control                          |              |              |
| Re et. al. | Multicentre<br>retrospective<br>cohort study<br><br>France | Haematology<br>MPN subset | 102 patients<br>-45%<br>lymphoma<br>-22%<br>myeloma<br>-13%<br>MDS/AML<br>-10% CLL<br>-10% MPN | 76 years<br>(33-93) | 67 Male<br>35 Female | BNT162b2<br>mRNA-1273<br><br>93%/7% | SARS-CoV-<br>2 S IgG<br>Range of<br>commercial<br>kits utilising<br>their<br>threshold | 21-28 days<br>post second<br>dose<br>8/10 (80%) | Not reported | Not reported |

**Supplementary Table 7: Summary of study characteristics and outcomes for patients with myeloproliferative neoplasm and chronic myeloid leukaemia**

| Study          | Type /Location                                              | Study population/ Comparator    | Number of participants (analysed) | Age Median             | Male/ Female           | Vaccine type                          | Analysis                                                                                      | Seropositivity                                                                                            | Rate of positive neutralising antibody/ cellular response           | Adverse events                                                       |
|----------------|-------------------------------------------------------------|---------------------------------|-----------------------------------|------------------------|------------------------|---------------------------------------|-----------------------------------------------------------------------------------------------|-----------------------------------------------------------------------------------------------------------|---------------------------------------------------------------------|----------------------------------------------------------------------|
| Avivi et. al.  | Single centre<br>Prospective cohort study<br><br>Israel     | Myeloma /<br>Healthy volunteers | 171 patients vs. 64 controls      | 70 years (range 38-94) | 96 male<br>75 female   | BNT162b2                              | SARS-CoV-2 S IgG Roche $\geq 0.8$ UI/ml = positive                                            | 14-21 days post second dose:<br>110/147 (75%) active treatment                                            | Not reported                                                        | At least one adverse event:<br>90/161 (53%) vs. 29/53 (55%) controls |
| Bird et. al.   | Retrospective cohort study<br><br>United Kingdom/<br>Europe | Myeloma                         | 93 patients                       | 67 years (47-87)       | 55 Male<br>38 Female   | BNT162b2<br>ChAdOx1<br><br>52%<br>48% | SARS-CoV-2 S IgG Ortho clinical $\geq 1$ signal/cut-off = positive                            | $\geq 21$ days post first dose:<br>32/66 (48%) on active therapy<br><br>20/27 (74%) not on active therapy | Not reported                                                        | Not reported                                                         |
| Terpos et. al. | Single centre prospective cohort study<br><br>Greece        | Myeloma<br><br>Matched Controls | 48 patients<br><br>102 controls   | 83 years (59-92)       | 29 Male<br>19 Female   | BNT162b2                              | SARS-CoV-2 neutralising Ab Genscript $\geq 30\%$ = positive $\geq 50\%$ = clinically relevant | Not reported                                                                                              | $\geq 50\%$ 22 days post first dose:<br>4/13(31%) no active therapy | Not reported                                                         |
| Terpos et. al. | Single centre prospective cohort study                      | Myeloma                         | 276 patients -77% myeloma         | 74 years (62-80)       | 151 Male<br>125 Female | BNT162b2<br>ChAdOx1                   | SARS-CoV-2 neutralising                                                                       | Not reported for active treatment                                                                         | Day 50 post first dose:<br>23/34 (68%)                              | First dose BNT162b2<br>71/215                                        |

|                     |                                                                               |                                                    |                                              |                  |                        |                                                    |                                                                             |                                                               |                                                                |                                                                                                                                                                                                                                              |
|---------------------|-------------------------------------------------------------------------------|----------------------------------------------------|----------------------------------------------|------------------|------------------------|----------------------------------------------------|-----------------------------------------------------------------------------|---------------------------------------------------------------|----------------------------------------------------------------|----------------------------------------------------------------------------------------------------------------------------------------------------------------------------------------------------------------------------------------------|
|                     | Greece                                                                        | Matched Controls                                   | -14% sMM<br>-9% MGUS<br><br>226 controls     |                  |                        | 78%/22%                                            | Ab<br>Genscript<br>≥ 30% =<br>positive<br>≥ 50% =<br>clinically<br>relevant |                                                               | no active<br>treatment                                         | (33%) local<br>reaction<br><br>28/215<br>(13%)<br>systemic<br>reaction<br><br>ChAdOx1<br>20/61 (33%)<br>local<br>reaction<br><br>Second dose<br>BNT162b2<br>68/215<br>(32%) local<br>reaction<br><br>45/215<br>(21%)<br>systemic<br>reaction |
| Van Oekelen et. al. | Single centre prospective and retrospective cohort study<br><br>United States | Myeloma<br><br>Matched control health care workers | 320 patients -260 sampled<br><br>67 controls | 68 years (38-93) | 185 Male<br>135 Female | BNT162b2 mRNA-1273 unknown<br><br>69%<br>27%<br>4% | SARS-CoV-2 S IgG ≥ 5 AU/ml = positive                                       | 51 days post second dose: 43/44 (98%)<br>no active treatment  | Not reported                                                   | Not reported                                                                                                                                                                                                                                 |
| Benjamini et. al.   | Multicentre prospective cohort study<br><br>Israel                            | CLL patients                                       | 373 patients                                 | 70 years (40-89) | 222 Male<br>151 Female | BNT162b2                                           | SARS-CoV-2 S IgG DiaSorin ≥ 15 AU/ml = positive                             | 14-21 days post second dose: 16/120 (13%)<br>active treatment | Neutralising antibody 14-21 days post second dose: 27/45 (60%) | At least 1 adverse event: 151/331 (47%)                                                                                                                                                                                                      |

|                      |                                                            |                                                  |                                 |                     |                       |                       |                                                                      |                                                                                                                                           |              |                                                                                                                                                                                                             |
|----------------------|------------------------------------------------------------|--------------------------------------------------|---------------------------------|---------------------|-----------------------|-----------------------|----------------------------------------------------------------------|-------------------------------------------------------------------------------------------------------------------------------------------|--------------|-------------------------------------------------------------------------------------------------------------------------------------------------------------------------------------------------------------|
|                      |                                                            |                                                  |                                 |                     |                       |                       | Abbott<br>>50 U/ml =<br>positive<br>'in house'<br>>1.1 =<br>positive | 143/253<br>(57%) no<br>active<br>treatment                                                                                                |              |                                                                                                                                                                                                             |
| Del Poeta<br>et. al. | Single centre<br>prospective<br>cohort study<br><br>Italy  | CLL patients                                     | 46 patients                     | Not<br>reported     | 29 Male<br>17 Female  | BNT162b2              | SARS-<br>CoV-2 S<br>IgG<br>Maglumi<br>≥1.1 =<br>positive             | 14-21 days<br>post second<br>dose:<br>12/29 (41%)<br>on active<br>treatment                                                               | Not reported | Not reported                                                                                                                                                                                                |
| Herishanu<br>et. al. | Single centre<br>prospective<br>cohort study<br><br>Israel | CLL patients<br><br>Control -age,<br>sex matched | 167 patients<br><br>52 controls | 71 years<br>(63-76) | 112 Male<br>55 Female | BNT162b2              | SARS-<br>CoV-2 S<br>IgG<br>Roche<br>≥0.8 IU/ml<br>= positive         | 14-21 days<br>post second<br>dose:<br>23/58 (55%)<br>treatment<br>naïve patients<br><br>12/75 (16%)<br>Patients on<br>active<br>treatment | Not reported | First dose<br>52/167<br>(31%)<br>local<br>reaction<br><br>21/167<br>(13%)<br>Systemic<br>reaction<br><br>Second dose<br>56/167<br>(34%)<br>local<br>reaction<br><br>21/167<br>(23%)<br>Systemic<br>reaction |
| Roeker et.<br>al.    | Single centre<br>retrospective<br>cohort study             | CLL patients                                     | 44 patients                     | 71 years<br>(37-89) | 23 Male<br>21 Female  | BNT162b2<br>mRNA-1273 | SARS-<br>CoV-2 S<br>IgG                                              | 21 days post<br>second dose:<br>6/26 (23%)                                                                                                | Not reported | Not reported                                                                                                                                                                                                |

|                |                                                            |                                                             |                                                                                                                                   |                      |                       |                     |                                                                                                                     |                                                                                                                                                                                                                           |              |              |
|----------------|------------------------------------------------------------|-------------------------------------------------------------|-----------------------------------------------------------------------------------------------------------------------------------|----------------------|-----------------------|---------------------|---------------------------------------------------------------------------------------------------------------------|---------------------------------------------------------------------------------------------------------------------------------------------------------------------------------------------------------------------------|--------------|--------------|
|                | United States                                              |                                                             |                                                                                                                                   |                      |                       | 57%/43%             | DiaSorin<br>≥ 15 AU/ml<br>= positive                                                                                | not on active<br>treatment<br><br>17/18 (94%)<br>treatment<br>naïve                                                                                                                                                       |              |              |
| Tadmor et. al. | Multicentre prospective observation study<br><br>Israel    | CLL patients                                                | 84 patients                                                                                                                       | Not reported overall | 53 Male*<br>29 Female | BNT162b2            | SARS-CoV-2 S IgG Abbott<br>≥ 50 U/ml<br>= positive<br><br>SARS-CoV-2 RBD IgG<br>>1.1 = positive                     | Day 22 post second dose:<br>6/21 (29%)<br>on active treatment<br><br>43/63 (68%)<br>not on active treatment                                                                                                               | Not reported | Not reported |
| Lim et. al.    | Multicentre prospective cohort study<br><br>United Kingdom | Lymphoma<br><br><br><br><br><br><br><br><br>Healthy control | 129 patients recruited<br>119 analysed<br>-66% indolent B-NHL<br>-29% aggressive B-NHL<br>-10% HL<br>-3% other<br><br>150 control | 69 years (IQR 57-74) | 81 Male<br>48 Female  | BNT162b2<br>ChAdOx1 | SARS-CoV-2 S IgG Meso Scale<br>Discovery<br>>0.55<br>BAU/ml = positive<br><br>RBD IgG<br>>0.73<br>BAU/ml = positive | 14 days post first dose:<br>9/31 (28%)<br>on active treatment<br><br>23/28 (82%)<br>not on active treatment<br><br>14-28 days post second dose:<br>13/33 (39%)<br>on active treatment<br><br>48/53 (91%)<br>not on active | Not reported | Not reported |

|                     |                                                               |             |                                                                                                                            |                      |                        |                                                 |                                                                                                           |                                                                                                      |              |                                                                            |
|---------------------|---------------------------------------------------------------|-------------|----------------------------------------------------------------------------------------------------------------------------|----------------------|------------------------|-------------------------------------------------|-----------------------------------------------------------------------------------------------------------|------------------------------------------------------------------------------------------------------|--------------|----------------------------------------------------------------------------|
|                     |                                                               |             |                                                                                                                            |                      |                        |                                                 |                                                                                                           | treatment                                                                                            |              |                                                                            |
| Agha et. al.        | Single centre retrospective cohort study<br><br>United States | Haematology | 67 patients                                                                                                                | 71 years (IQR 65-77) | 35 Male<br>32 Female   | BNT162b2 mRNA-1273<br><br>51%/42%<br>7% unknown | SARS-CoV-2 S IgG Beckman Coulter $\geq 1.00$ = positive                                                   | 21 days post second dose: 15/29 (52%)<br>Active treatment<br><br>21/38 (55%) not on active treatment | Not reported | Not reported                                                               |
| Greenberger et. al. | Multicentre prospective cohort study<br><br>United States     | Haematology | 1445 patients<br>-45% CLL<br>-25% NHL<br>-5% HL<br>-15% myeloma<br>-4% acute leukaemia<br>-2% CML<br>-2% MPN<br>-2% others | 68 years (16-110)    | 574 Male<br>871 Female | BNT162b2 mRNA-1273<br><br>55%<br>45%            | SARS-CoV-2 S IgG Roche $\geq 0.8$ IU/ml = positive                                                        | >14 days post second dose: 669/747 (90%) not on active treatment                                     | Not reported | Not reported                                                               |
| Harrington et. al.  | Single centre prospective cohort study<br><br>United Kingdom  | MPN         | 21 patients                                                                                                                | 58 years (36-72)     | 7 Male<br>21 Female    | BNT162b2                                        | SARS-CoV-2 S IgG 1:25 = positive<br><br>SARS-CoV-2 neutralising ID50 = positive<br><br>SARS-CoV-2 T cells | 21 days post first dose: 4/7 (57%) active treatment<br><br>12/14 (86%) not on active treatment       | Not reported | At least 1 adverse event:<br>12/21 (57%) local<br><br>10/21 (48%) systemic |



|            |                                                      |             |                                                                                          |                  |                      |                                  |                                                                        |                                                                                  |              |              |
|------------|------------------------------------------------------|-------------|------------------------------------------------------------------------------------------|------------------|----------------------|----------------------------------|------------------------------------------------------------------------|----------------------------------------------------------------------------------|--------------|--------------|
|            |                                                      |             | indolent lymphoma<br>-15% plasma cell<br>-12% CLL<br>- 9% other lymphoma<br>- 6% myeloid |                  |                      |                                  | ff ratio $\geq 1.4$<br>= positive                                      | observation/no treatment<br><br>31/63 (49%) patients in remission post treatment |              |              |
| Re et. al. | Multicentre retrospective cohort study<br><br>France | Haematology | 102 patients<br>-45% lymphoma<br>-22% myeloma<br>-13% MDS/AML<br>-10% CLL<br>-10% MPN    | 76 years (33-93) | 67 Male<br>35 Female | BNT162b2 mRNA-1273<br><br>93%/7% | SARS-CoV-2 S IgG<br>Range of commercial kits utilising their threshold | 21-28 days post second dose<br>31/47 (66%) no active treatment                   | Not reported | Not reported |

**Supplementary Table 8: Summary of study characteristics and outcomes for subgroup analysis active treatment vs. no active treatment**

| Study             | Type /Location                                       | Study population/ Comparator                  | Number of participants (analysed) | Age Median       | Male/ Female           | Vaccine type | Analysis                                                                                                                | Seropositivity                                                                                                               | Rate of positive neutralising antibody/ cellular response            | Adverse events                                                                                                                                                              |
|-------------------|------------------------------------------------------|-----------------------------------------------|-----------------------------------|------------------|------------------------|--------------|-------------------------------------------------------------------------------------------------------------------------|------------------------------------------------------------------------------------------------------------------------------|----------------------------------------------------------------------|-----------------------------------------------------------------------------------------------------------------------------------------------------------------------------|
| Benjamini et. al. | Multicentre prospective cohort study<br><br>Israel   | CLL patients                                  | 373 patients                      | 70 years (40-89) | 222 Male<br>151 Female | BNT162b2     | SARS-CoV-2 S IgG<br>DiaSorin $\geq 15$ AU/ml = positive<br>Abbott $>50$ U/ml = positive<br>'in house' $>1.1$ = positive | 14-21 days post second dose:<br>2/39 (5%)<br>CD20 $<12$ months<br>32/92 (35%)<br>CD20 $>12$ months                           | Neutralising antibody<br>14-21 days post second dose:<br>27/45 (60%) | At least 1 adverse event:<br>151/331 (47%)                                                                                                                                  |
| Herishanu et. al. | Single centre prospective cohort study<br><br>Israel | CLL patients<br><br>Control -age, sex matched | 167 patients<br><br>52 controls   | 71 years (63-76) | 112 Male<br>55 Female  | BNT162b2     | SARS-CoV-2 S IgG<br>Roche $\geq 0.8$ IU/ml = positive                                                                   | 14-21 days post second dose:<br>0/22 (0%)<br>treatment with CD20 $<12$ months<br><br>25/55 (46%)<br>if CD20 $\geq 12$ months | Not reported                                                         | First dose<br>52/167 (31%)<br>local reaction<br>21/167 (13%)<br>Systemic reaction<br><br>Second dose<br>56/167 (34%)<br>local reaction<br>21/167 (23%)<br>Systemic reaction |

|                 |                                                                |                          |                                     |                      |                       |                                   |                                                                                           |                                                                                                  |              |              |
|-----------------|----------------------------------------------------------------|--------------------------|-------------------------------------|----------------------|-----------------------|-----------------------------------|-------------------------------------------------------------------------------------------|--------------------------------------------------------------------------------------------------|--------------|--------------|
| Roeker et. al.  | Single centre retrospective cohort study<br><br>United States  | CLL patients             | 44 patients                         | 71 years (37-89)     | 23 Male<br>21 Female  | BNT162b2 mRNA-1273<br><br>57%/43% | SARS-CoV-2 S IgG DiaSorin<br>≥ 15 AU/ml = positive                                        | 21 days post second dose:<br>2/14 (14%) if CD20 < 12 months                                      | Not reported | Not reported |
| Tadmor et. al.  | Multicentre prospective observation study<br><br>Israel        | CLL patients             | 84 patients                         | Not reported overall | 53 Male*<br>29 Female | BNT162b2                          | SARS-CoV-2 S IgG Abbott<br>≥ 50 U/ml = positive<br><br>SARS-CoV-2 RBD IgG >1.1 = positive | Day 22 post second dose:<br>18/22 (82%) if CD20 > 12 months<br><br>0/22 (0%) CD20 <12 months     | Not reported | Not reported |
| Gurion et. al.  | Multicentre prospective cohort study<br><br>Israel             | Lymphoma                 | 162 patients<br>-88% NHL<br>-12% HL | 65 years (52-73)     | 89 Male<br>73 Female  | BNT162b2                          | SARS-CoV-2 S IgG Abbott<br>≥ 50 IU/ml = positive                                          | 28 days post second dose:<br>25/66 (38%) CD20 < 12 months<br><br>17/21 (81%) if CD20 > 12 months | Not reported | Not reported |
| Easdale et. al. | Single centre retrospective cohort study<br><br>United Kingdom | Allogeneic HCT >3 months | 55 patients                         | 50 years (18-73)     | 34 Male<br>21 Female  | BNT162b2 ChAdOx1<br><br>38%/62%   | SARS-CoV-2 S IgG Ortho clinical<br>≥1 signal/cut-off =                                    | 42 days post first dose:<br>2/10 (20%) if CD20 < 12 months                                       | Not reported | Not reported |

|                         |                                                               |             |                                                                                                                                                        |                      |                        |                                                       |                                                         |                                                         |              |              |
|-------------------------|---------------------------------------------------------------|-------------|--------------------------------------------------------------------------------------------------------------------------------------------------------|----------------------|------------------------|-------------------------------------------------------|---------------------------------------------------------|---------------------------------------------------------|--------------|--------------|
|                         |                                                               |             |                                                                                                                                                        |                      |                        |                                                       | positive                                                |                                                         |              |              |
| Agha et. al.            | Single centre retrospective cohort study<br><br>United States | Haematology | 67 patients                                                                                                                                            | 71 years (IQR 65-77) | 35 Male<br>32 Female   | BNT162b2 mRNA-1273<br><br>51%<br>42%<br>7%<br>unknown | SARS-CoV-2 S IgG Beckman Coulter $\geq 1.00$ = positive | 21 days post second dose: 2/9 (22%)<br>CD20 < 12 months | Not reported | Not reported |
| Greenberger et. al.     | Multicentre prospective cohort study<br><br>United States     | Haematology | 1445 patients<br>-45% CLL<br>-25% NHL<br>-5% HL<br>-15% myeloma<br>-4% acute leukaemia<br>-2% CML<br>-2% MPN<br>-2% others                             | 68 years (16-110)    | 574 Male<br>871 Female | BNT162b2 mRNA-1273<br><br>55%<br>45%                  | SARS-CoV-2 S IgG Roche $\geq 0.8$ IU/ml = positive      | >14 days post second dose: 97/263 (37%) on CD20         | Not reported | Not reported |
| Herzog Tzarfati et. al. | Single centre prospective cohort study<br><br>Israel          | Haematology | 315 patients<br>-22% MPN<br>-17% Myeloma<br>-16% aggressive NHL<br>-13% indolent NHL<br>-11% CLL<br>-7% CML<br>-5% HL<br>-5% Acute leukemia<br>-5% MDS | 70 years (IQR 61-77) | 223 Male<br>200 Female | BNT162b2                                              | SARS-CoV-2 S IgG DiaSorin $\geq 12$ AU/ml = positive    | 30-60 days post second dose: 0/28 (0%) on CD20          | Not reported | Not reported |

|                 |                                                                               |                                                         |                                                                                                         |                       |                       |                                   |                                                                     |                                                                                                                                |              |                       |
|-----------------|-------------------------------------------------------------------------------|---------------------------------------------------------|---------------------------------------------------------------------------------------------------------|-----------------------|-----------------------|-----------------------------------|---------------------------------------------------------------------|--------------------------------------------------------------------------------------------------------------------------------|--------------|-----------------------|
|                 |                                                                               | Matched Healthy control                                 | 108 controls                                                                                            |                       |                       |                                   |                                                                     |                                                                                                                                |              |                       |
| Jurgens et. al. | Single centre prospective cohort study<br><br>United States                   | Haematology<br><br>Control health care workers          | 67 patients<br>-31% CLL<br>-63% NHL<br>-6% HL<br><br>35 controls                                        | 71 years (24-90)      | 36 Male<br>31 Female  | BNT162b2 mRNA-1273<br><br>46%/54% | SARS-CoV-2 S IgG 'in house' OD450 ≥ 3 = positive                    | 21 days post second dose: 0/8 (0%) on CD20                                                                                     | Not reported | Not reported          |
| Re et. al.      | Multicentre retrospective cohort study<br><br>France                          | Haematology                                             | 102 patients<br>-45% lymphoma<br>-22% myeloma<br>-13% MDS/AML<br>-10% CLL<br>-10% MPN                   | 76 years (33-93)      | 67 Male<br>35 Female  | BNT162b2 mRNA-1273<br><br>93%/7%  | SARS-CoV-2 S IgG Range of commercial kits utilising their threshold | 21-28 days post second dose<br>1/17 (6%) if on CD20<br><br>14/22 (64%) if CD20 ≥ 12 months                                     | Not reported | Not reported          |
| Thakkar et. al. | Single centre prospective and retrospective cohort study<br><br>United States | Haematology<br><br>Solid tumours<br><br>Healthy control | 66 patients<br>-39% lymphoid<br>-27% myeloid<br>-33% plasma cell<br><br>134 patients<br><br>26 controls | Not reported for haem | Not reported for haem | BNT162b2 mRNA-1273 Ad26           | SARS-CoV-2 S IgG Abbott ≥ 50 AU/ml = positive                       | 29 days post completion (2 doses for mRNA, 1 dose for Ad26):<br>4/5 (80%) CD20 < 12 months<br><br>12/18 (67%) CD20 > 12 months | Not reported | Not reported for haem |

**Supplementary Table 9: Summary of study characteristics and outcomes for subgroup analysis CD20 therapy less than 12 months vs. CD20 therapy 12 or more months**

| Study             | Type /Location                                       | Study population/ Comparator                  | Number of participants (analysed) | Age Median       | Male/ Female           | Vaccine type | Analysis                                                                                                                | Seropositivity                                                                                                             | Rate of positive neutralising antibody/ cellular response            | Adverse events                                                                                           |
|-------------------|------------------------------------------------------|-----------------------------------------------|-----------------------------------|------------------|------------------------|--------------|-------------------------------------------------------------------------------------------------------------------------|----------------------------------------------------------------------------------------------------------------------------|----------------------------------------------------------------------|----------------------------------------------------------------------------------------------------------|
| Benjamini et. al. | Multicentre prospective cohort study<br><br>Israel   | CLL patients                                  | 373 patients                      | 70 years (40-89) | 222 Male<br>151 Female | BNT162b2     | SARS-CoV-2 S IgG<br>DiaSorin $\geq 15$ AU/ml = positive<br>Abbott $>50$ U/ml = positive<br>'in house' $>1.1$ = positive | 14-21 days post second dose:<br>14/79 (18%)<br>BTKi<br>2/34 (6%)<br>venetoclax<br>7/49 (14%)<br>venetoclax plus CD20       | Neutralising antibody<br>14-21 days post second dose:<br>27/45 (60%) | At least 1 adverse event:<br>151/331 (47%)                                                               |
| Del Poeta et. al. | Single centre prospective cohort study<br><br>Italy  | CLL patients                                  | 46 patients                       | Not reported     | 29 Male<br>17 Female   | BNT162b2     | SARS-CoV-2 S IgG<br>Maglumi $\geq 1.1$ = positive                                                                       | 14-21 days post second dose:<br>8/21 (38%)<br>BTKi<br>2/8 (25%)<br>Venetoclax                                              | Not reported                                                         | Not reported                                                                                             |
| Herishanu et. al. | Single centre prospective cohort study<br><br>Israel | CLL patients<br><br>Control -age, sex matched | 167 patients<br><br>52 controls   | 71 years (63-76) | 112 Male<br>55 Female  | BNT162b2     | SARS-CoV-2 S IgG<br>Roche $\geq 0.8$ IU/ml = positive                                                                   | 14-21 days post second dose:<br>8/50 (16%)<br>BTKi<br><br>3/20 (14%)<br>venetoclax +/- CD20<br><br>2/5 (40%)<br>venetoclax | Not reported                                                         | First dose<br>52/167 (31%)<br>local reaction<br><br>21/167 (13%)<br>Systemic reaction<br><br>Second dose |

|                |                                                               |                                                  |                                 |                      |                        |                                       |                                                                                                             |                                                                               |              |                                                                                     |
|----------------|---------------------------------------------------------------|--------------------------------------------------|---------------------------------|----------------------|------------------------|---------------------------------------|-------------------------------------------------------------------------------------------------------------|-------------------------------------------------------------------------------|--------------|-------------------------------------------------------------------------------------|
|                |                                                               |                                                  |                                 |                      |                        |                                       |                                                                                                             |                                                                               |              | 56/167<br>(34%)<br>local<br>reaction<br><br>21/167<br>(23%)<br>Systemic<br>reaction |
| Parry et. al.  | Single centre prospective cohort study<br><br>United Kingdom  | CLL patients<br><br>Healthy age matched controls | 299 patients<br><br>93 controls | 69 years (IQR 63-74) | 159 Male<br>140 Female | BNT162b2<br>ChAxOd1<br><br>52%<br>48% | SARS-CoV-2 S<br>IgG<br>Roche<br>≥ 0.8 IU/ml<br>= positive                                                   | 43 days post first dose:<br>Serum<br>2/18 (11%)<br>BTKi                       | Not reported | Not reported                                                                        |
| Roeker et. al. | Single centre retrospective cohort study<br><br>United States | CLL patients                                     | 44 patients                     | 71 years (37-89)     | 23 Male<br>21 Female   | BNT162b2<br>mRNA-1273<br><br>57%/43%  | SARS-CoV-2 S<br>IgG<br>DiaSorin<br>≥ 15 AU/ml<br>= positive                                                 | 21 days post second dose:<br>3/14 (21%)<br>BTKi<br>0/7 (0%)<br>Venetoclax     | Not reported | Not reported                                                                        |
| Tadmor et. al. | Multicentre prospective observation study<br><br>Israel       | CLL patients                                     | 84 patients                     | Not reported overall | 53 Male<br>29 Female   | BNT162b2                              | SARS-CoV-2 S<br>IgG<br>Abbott<br>≥ 50 U/ml<br>= positive<br><br>SARS-CoV-2<br>RBD IgG<br>>1.1 =<br>positive | Day 22 post second dose:<br>4/11 (36%)<br>BTKi<br><br>1/6 (17%)<br>venetoclax | Not reported | Not reported                                                                        |



|            |                                                      |                             |                                                                                       |                  |                      |                                     |                                                                        |                                                                   |              |              |
|------------|------------------------------------------------------|-----------------------------|---------------------------------------------------------------------------------------|------------------|----------------------|-------------------------------------|------------------------------------------------------------------------|-------------------------------------------------------------------|--------------|--------------|
|            |                                                      | Control health care workers | 35 controls                                                                           |                  |                      |                                     | = positive                                                             |                                                                   |              |              |
| Re et. al. | Multicentre retrospective cohort study<br><br>France | Haematology                 | 102 patients<br>-45% lymphoma<br>-22% myeloma<br>-13% MDS/AML<br>-10% CLL<br>-10% MPN | 76 years (33-93) | 67 Male<br>35 Female | BNT162b2 mRNA-1273<br><br>93%<br>7% | SARS-CoV-2 S IgG<br>Range of commercial kits utilising their threshold | 21-28 days post second dose<br>27/36 (75%) if on targeted therapy | Not reported | Not reported |

**Supplementary Table 10: Summary of study characteristics and outcomes for subgroup analysis targeted therapy vs. no targeted therapy**

| Study           | Type /Location                                                         | Study population/ Comparator             | Number of participants (analysed)                       | Age Median                           | Male/ Female          | Vaccine type                       | Analysis                                                           | Seropositivity                                                                                                                                                                                | Rate of positive neutralising antibody/ cellular response | Adverse events        |
|-----------------|------------------------------------------------------------------------|------------------------------------------|---------------------------------------------------------|--------------------------------------|-----------------------|------------------------------------|--------------------------------------------------------------------|-----------------------------------------------------------------------------------------------------------------------------------------------------------------------------------------------|-----------------------------------------------------------|-----------------------|
| Bird et. al.    | Single centre retrospective cohort study<br><br>United Kingdom/ Europe | Myeloma                                  | 93 patients                                             | 67 years (47-87)                     | 55 Male<br>38 Female  | BNT162b2<br>ChAdOx1<br><br>52%/48% | SARS-CoV-2 S IgG<br>Ortho clinical<br>≥1 signal/cut-off = positive | ≥ 21 days post first dose:<br>6/8 (75%)<br>HCT ≤/ = 12 months<br><br>37/69 (54%)<br>HCT > 12 months                                                                                           | Not reported                                              | Not reported          |
| Dhakal et. al.  | Single centre retrospective cohort study<br><br>United States          | Autologous<br>Allogeneic<br>HCT<br>CAR-T | 130 patients<br>-45 autoHCT<br>-71 alloHCT<br>-14 CAR-T | 65 years (45-75)<br>64 years (25-77) | Not reported          | BNT162b2<br>mRNA-1273<br>Ad26      | SARS-CoV-2 S IgG<br>EUROIMM UN<br>≥1.1 signal/cut-off = positive   | 14 days post completion of vaccination:<br><br>AutoHCT<br>11/15 (73%)<br>< 12 months<br>16/30 (53%)<br>≥ 12 months<br><br>AlloHCT<br>11/19 (58%)<br>< 12 months<br>38/52 (73%)<br>≥ 12 months | Not reported                                              | Not reported          |
| Thakkar et. al. | Single centre prospective and retrospective cohort study               | Haematology                              | 66 patients<br>-39% lymphoid<br>-27% myeloid            | Not reported for haem                | Not reported for haem | BNT162b2<br>mRNA-1273<br>Ad26      | SARS-CoV-2 S IgG<br>Abbott<br>≥ 50 AU/ml                           | 29 days post completion (2 doses for mRNA, 1 dose for                                                                                                                                         | Not reported                                              | Not reported for haem |

|                     |                                                                               |                                                    |                                              |                  |                        |                                                    |                                       |                                                                                       |              |              |
|---------------------|-------------------------------------------------------------------------------|----------------------------------------------------|----------------------------------------------|------------------|------------------------|----------------------------------------------------|---------------------------------------|---------------------------------------------------------------------------------------|--------------|--------------|
|                     | United States                                                                 | Solid tumours                                      | -33% plasma cell<br>134 patients             |                  |                        |                                                    | = positive                            | Ad26):<br>2/3 (67%) if<br>HCT < 12<br>months<br><br>17/23 (74%)<br>HCT > 12<br>months |              |              |
|                     |                                                                               | Healthy control                                    | 26 controls                                  |                  |                        |                                                    |                                       |                                                                                       |              |              |
| Van Oekelen et. al. | Single centre prospective and retrospective cohort study<br><br>United States | Myeloma<br><br>Matched control health care workers | 320 patients -260 sampled<br><br>67 controls | 68 years (38-93) | 185 Male<br>135 Female | BNT162b2 mRNA-1273 unknown<br><br>69%<br>27%<br>4% | SARS-CoV-2 S IgG ≥ 5 AU/ml = positive | 51 days post second dose:<br>9/9 (100%) if<br>HCT < 12<br>months                      | Not reported | Not reported |

**Supplementary Table 11: Summary of study characteristics and outcomes for subgroup analysis haematopoietic stem cell transplant within 12 months vs. 12 or more months**

| Study             | Type /Location                                                 | Study population/ Comparator                         | Number of participants (analysed) | Age Median           | Male/ Female         | Vaccine type                                       | Analysis                                                           | Seropositivity                                                                    | Rate of positive neutralising antibody/ cellular response | Adverse events |
|-------------------|----------------------------------------------------------------|------------------------------------------------------|-----------------------------------|----------------------|----------------------|----------------------------------------------------|--------------------------------------------------------------------|-----------------------------------------------------------------------------------|-----------------------------------------------------------|----------------|
| Agha et. al.      | Single centre retrospective cohort study<br><br>United States  | Haematology                                          | 67 patients                       | 71 years (IQR 65-77) | 35 Male<br>32 Female | BNT162b2 mRNA-1273<br><br>51%<br>42%<br>7% unknown | SARS-CoV-2 S IgG Beckman Coulter $\geq 1.00$ = positive            | 21 days post second dose:<br>15/34 (44%)<br>BNT162b2 16/28 (57%)<br>mRNA-1273     | Not reported                                              | Not reported   |
| Bird et. al.      | Retrospective cohort study<br><br>United Kingdom/ Europe       | Myeloma                                              | 93 patients                       | 67 years (47-87)     | 55 Male<br>38 Female | BNT162b2 ChAdOx1<br><br>52%<br>48%                 | SARS-CoV-2 S IgG Ortho clinical $\geq 1$ signal/cut-off = positive | $\geq 21$ days post first dose:<br>26/48 (54%)<br>BNT162b2 26/45 (58%)<br>ChAdOx1 | Not reported                                              | Not reported   |
| Chowdhury et. al. | Single centre retrospective cohort<br><br>United Kingdom       | CML and MPN<br><br>Healthcare workers > 60 years old | 59 patients<br><br>232 controls   | 62 years (IQR 52-73) | 27 Male<br>32 Female | BNT162b2 ChAdOx1<br><br>37%<br>63%                 | SARS-CoV-2 S IgG Abbott $\geq 50$ AU/mL = positive                 | $\geq 2$ weeks post first dose:<br>12/22 (55%)<br>BNT162b2 22/37 (59%)<br>ChAdOx1 | Not reported                                              | Not reported   |
| Easdale et. al.   | Single centre retrospective cohort study<br><br>United Kingdom | Allogeneic HCT >3 months                             | 55 patients                       | 50 years (18-73)     | 34 Male<br>21 Female | BNT162b2 ChAdOx1<br><br>38%<br>62%                 | SARS-CoV-2 S IgG Ortho clinical $\geq 1$                           | 42 days post first dose:<br>4/21 (19%)<br>BNT162b2                                | Not reported                                              | Not reported   |

|                     |                                                            |                                                                                  |                                                                                                                                   |                      |                        |                                              |                                                                                                                  |                                                                                                                                                                               |              |              |
|---------------------|------------------------------------------------------------|----------------------------------------------------------------------------------|-----------------------------------------------------------------------------------------------------------------------------------|----------------------|------------------------|----------------------------------------------|------------------------------------------------------------------------------------------------------------------|-------------------------------------------------------------------------------------------------------------------------------------------------------------------------------|--------------|--------------|
|                     |                                                            |                                                                                  |                                                                                                                                   |                      |                        |                                              | signal/cut-off = positive                                                                                        | 17/34 (50%)<br>ChAdOx1                                                                                                                                                        |              |              |
| Greenberger et. al. | Multicentre prospective cohort study<br><br>United States  | Haematology                                                                      | 1445 patients<br>-45% CLL<br>-25% NHL<br>-5% HL<br>-15% MM<br>-4% acute leukaemia<br>-2% CML<br>-2% MPN<br>-2% others             | 68 years (16-110)    | 574 Male<br>871 Female | BNT162b2 mRNA-1273<br><br>55%<br>45%         | SARS-CoV-2 S IgG Roche<br>≥ 0.8 IU/ml = positive                                                                 | >14 days post second dose:<br>585/793 (74%)<br>BNT162b2<br><br>505/652 (77%)<br>mRNA-1273                                                                                     | Not reported | Not reported |
| Lim et. al.         | Multicentre prospective cohort study<br><br>United Kingdom | Lymphoma Subset off treatment<br><br><br><br><br><br><br><br><br>Healthy control | 129 patients recruited<br>119 analysed<br>-66% indolent B-NHL<br>-29% aggressive B-NHL<br>-10% HL<br>-3% other<br><br>150 control | 69 years (IQR 57-74) | 81 Male<br>48 Female   | BNT162b2 ChAdOx1                             | SARS-CoV-2 S IgG Meso Scale Discovery<br>>0.55<br>BAU/ml = positive<br><br>RBD IgG<br>>0.73<br>BAU/ml = positive | 14 days post first dose:<br>14/18 (78%)<br>BNT162b2<br><br>9/10 (90%)<br>ChAdOx1<br><br>14-28 days post second dose:<br>31/35 (89%)<br>BNT162b2<br><br>17/18 (94%)<br>ChAdOx1 | Not reported | Not reported |
| Van Oekelen et. al. | Single centre prospective and retrospective cohort study   | Myeloma                                                                          | 320 patients<br>-260 sampled                                                                                                      | 68 years (38-93)     | 185 Male<br>135 Female | BNT162b2 mRNA-1273 unknown<br><br>69%<br>27% | SARS-CoV-2 S IgG<br>≥ 5 AU/ml = positive                                                                         | 51 days post second dose:<br>144/147 (98%)<br>BNT162b2                                                                                                                        | Not reported | Not reported |

|  |               |                                     |             |  |  |    |  |                       |  |  |
|--|---------------|-------------------------------------|-------------|--|--|----|--|-----------------------|--|--|
|  | United States | Matched control health care workers | 67 controls |  |  | 4% |  | 68/76 (89%) mRNA-1273 |  |  |
|--|---------------|-------------------------------------|-------------|--|--|----|--|-----------------------|--|--|

**Supplementary Table 12: Summary of study characteristics and outcomes for subgroup analysis vaccine type (BNT162b2 vs others)**

|                       | All studies (n=44)                                                  |                                                                     |                                                                                          | Good and fair quality studies (n=23)                                |                                                                     |                                                                                          |
|-----------------------|---------------------------------------------------------------------|---------------------------------------------------------------------|------------------------------------------------------------------------------------------|---------------------------------------------------------------------|---------------------------------------------------------------------|------------------------------------------------------------------------------------------|
|                       | Single arm studies                                                  | Intervention arm of comparator studies                              | Intervention vs. control cohort                                                          | Single arm studies                                                  | Intervention arm of comparator studies                              | Intervention vs. control cohort                                                          |
|                       | Pooled response rate (95% CI)                                       | Pooled response rate (95% CI)                                       | Odds ratio (95% CI)<br>Heterogeneity<br><i>p</i> -value                                  | Pooled response rate (95% CI)                                       | Pooled response rate (95% CI)                                       | Odds ratio (95% CI)<br>Heterogeneity<br><i>p</i> -value                                  |
| Following second dose | 0.62 (0.55-0.75)<br><br><i>I</i> <sup>2</sup> = 92%, <i>p</i> <0.01 | 0.66 (0.57-0.75)<br><br><i>I</i> <sup>2</sup> = 93%, <i>p</i> <0.01 | OR 0.04 (0.02-0.08)<br><i>p</i> <0.01<br><br><i>I</i> <sup>2</sup> = 70%, <i>p</i> <0.01 | 0.65 (0.54-0.75)<br><br><i>I</i> <sup>2</sup> = 95%, <i>p</i> <0.01 | 0.64 (0.47-0.82)<br><br><i>I</i> <sup>2</sup> = 96%, <i>p</i> <0.01 | OR 0.05 (0.01-0.20)<br><i>P</i> <0.01<br><br><i>I</i> <sup>2</sup> = 74%, <i>p</i> <0.01 |
| Following first dose  | 0.51 (0.38-0.64)<br><br><i>I</i> <sup>2</sup> = 92%, <i>p</i> <0.01 | 0.37 (0.23-0.51)<br><br><i>I</i> <sup>2</sup> = 90%, <i>p</i> <0.01 | OR 0.10 (0.04-0.29)<br><i>p</i> <0.01<br><i>I</i> <sup>2</sup> = 86%, <i>p</i> <0.01     | 0.53 (0.33-0.73)<br><br><i>I</i> <sup>2</sup> = 93%, <i>p</i> <0.01 | 0.35 (0.04-0.65)<br><br><i>I</i> <sup>2</sup> = 93%, <i>p</i> <0.01 | OR 0.17 (0.04-0.75)<br><i>p</i> =0.03<br><i>I</i> <sup>2</sup> = 87%, <i>p</i> <0.01     |

**Supplementary Table 13: Summary of seropositivity rates for patients with haematological malignancy following 2 and 1 dose of COVID-19 vaccine by study quality (sensitivity analysis)**

## Additional information: Search strategy

Database: Ovid MEDLINE(R) ALL <1946 to August 31, 2021>

Search Strategy:

- 
- 1 exp hematologic neoplasms/ or exp leukemia/ or exp lymphoma/ or exp multiple myeloma/ or exp myeloproliferative disorders/ or exp myelodysplastic-myeloproliferative diseases/ or exp Stem Cell Transplantation/ or exp bone marrow transplantation/ (554418)
  - 2 ((h?ematologic\* or hematopoietic or blood or bone marrow) adj3 (cancer\* or neoplasm\* or malignan\* or carcinoma\*)).mp. (56690)
  - 3 (leuk?emia\* or lymphoma\* or myeloma\* or hodgkin\* or myelodysplastic or myeloproliferative or polycythemia vera or stem cell transplant\* or bone marrow transplant\* or chimeric antigen receptor therap\* or CAR-T).mp. (723006)
  - 4 1 or 2 or 3 (758330)
  - 5 exp COVID-19 vaccines/ or ((exp vaccines/ or exp immunization/) and (COVID-19/ or SARS-CoV-2/)) (6448)
  - 6 ((covid\* or SARS-CoV-2 or coronavirus or BNT162b2 or ChAdOx1 or AZD 1222, or mRNA-1273 or Ad26\* or Ad5\* or NVX-CoV2373 or pfizer or astrazeneca or astra-zeneca or oxford or novavax or moderna or johnson) adj2 (vaccin\* or immuniz\* or immunis\*)).mp. (9371)
  - 7 5 or 6 (11023)
  - 8 4 and 7 (191)
  - 9 limit 8 to english language (185)
  - 10 limit 9 to yr="2020 -Current" (185)

\*\*\*\*\*

Database: Embase <1974 to 2021 August 31>

Search Strategy:

- 
- 1 exp hematologic malignancy/ or exp leukemia/ or exp lymphoma/ or exp myeloma/ or exp myeloproliferative disorder/ or exp myelodysplastic syndrome/ or exp Stem Cell Transplantation/ or exp bone marrow transplantation/ (867821)
  - 2 ((h?ematologic\* or hematopoietic or blood or bone marrow) adj3 (cancer\* or neoplasm\* or malignan\* or carcinoma\*)).mp. (95692)
  - 3 (leuk?emia\* or lymphoma\* or myeloma\* or hodgkin\* or myelodysplastic or myeloproliferative or polycythemia vera or stem cell transplant\* or bone marrow transplant\* or chimeric antigen receptor therap\* or CAR-T).mp. (1032174)
  - 4 1 or 2 or 3 (1097575)
  - 5 exp SARS-CoV-2 vaccine/ or ((exp vaccine/ or exp immunization/) and (exp coronavirus disease 2019/ or exp Severe acute respiratory syndrome coronavirus 2/)) (12263)
  - 6 ((covid\* or SARS-CoV-2 or coronavirus or BNT162b2 or ChAdOx1 or AZD 1222, or mRNA-1273 or Ad26\* or Ad5\* or NVX-CoV2373 or pfizer or astrazeneca or astra-zeneca or oxford or novavax or moderna or johnson) adj2 (vaccin\* or immuniz\* or immunis\*)).mp. (9360)
  - 7 5 or 6 (14554)
  - 8 4 and 7 (339)
  - 9 limit 8 to english language (333)
  - 10 limit 9 to yr="2020 -Current" (329)

\*\*\*\*\*

Cochrane CENTRAL

Search Name: Covid-19 vaccine haem SR

Last Saved: 31/08/2021 13:15:41

ID Search

#1 (h?ematologic\* or hematopoietic or blood or bone marrow) near/3 (cancer\* or neoplasm\* or malignan\* or carcinoma\*)

#2 (leuk?emia\* or lymphoma\* or myeloma\* or hodgkin\* or myelodysplastic or myeloproliferative or polycythemia vera or stem cell transplant\* or bone marrow transplant\* or chimeric antigen receptor therap\* or CAR-T)

#3 #1 or #2

#4 (covid\* or SARS-CoV-2 or coronavirus or BNT162b2 or ChAdOx1 or AZD 1222, or mRNA-1273 or Ad26\* or Ad5\* or NVX-CoV2373 or pfizer or astrazeneca or astra-zeneca or oxford or novavax or moderna or johnson) near/2 (vaccin\* or immuniz\* or immunis\*)

#5 #3 and #4 with Cochrane Library publication date in The last 2 years

### **Additional information: Abbreviations**

CLL: chronic lymphocytic leukaemia; NHL: non hodgkins lymphoma; HL: hodgkins lymphoma; AML: acute myeloid leukaemia; MDS: myelodysplastic syndrome; MM: myeloma; MGUS: monoclonal gammopathy of unknown significance; WG: Waldenstrom's magroglobulinaemia; HCT: haematopoietic stem cell transplantation; CAR-T: chimeric antigen receptor T cell; MPN: myeloproliferative neoplasm; CML: chronic myeloid leukaemia; ET: Essential thrombocytosis; PV: polycythaemia vera; MF: myelofibrosis; AU: arbitrary unit

BNT162b2: Tozinameran (Pfizer); mRNA1273: Spikevax (Moderna); ChAdOx1: Vaxzevria (AstraZeneca); Ad26: Janssen
